# Supplementary material for: Secondary Metabolites and Their Cytotoxic Activity of Artemisia nitrosa Weber. and Artemisia marschalliana Spreng.
Source: MDPI journal article supplement (doi:10.3390/molecules27228074), 2022-11-21
Supplement: s1 [file s1]

## Supplementary information.

### **Secondary Metabolites and Their Cytotoxic Activity of *Artemisia nitrosa* Weber. and *Artemisia marschalliana* Spreng.**

Aizhan Kazymbetova<sup>1,2,3</sup>, Magzhan Amangeldi<sup>1,2,3</sup>, Aliya Nurlybekova<sup>1,4</sup>, Ulpan Amzeyeva<sup>1,4</sup>, Kunbike Baktybala<sup>1,4</sup>, Chun-Ping Tang<sup>3</sup>, Chang-Qiang Ke<sup>3</sup>, Sheng Yao<sup>3</sup>, Yang Ye<sup>2,3\*</sup>, Janar Jenis<sup>1,2,3,4\*</sup>

<sup>1</sup> The Research Center for Medicinal Plants, Al-Farabi Kazakh National University, al-Farabi ave. 71, Almaty, 050040, Kazakhstan

<sup>2</sup> University of Chinese Academy of Sciences, Beijing 100049, China

<sup>3</sup> State Key Laboratory of Drug Research, Shanghai Institute of Materia Medica, Chinese Academy of Sciences, Shanghai 201203, China

<sup>4</sup> Research Institute for Natural Products & Technology, Almaty 050046, Kazakhstan

\*Correspondence: [yye@simmm.ac.cn](mailto:yye@simmm.ac.cn) (Y.Y.); [janarjenis@kaznu.kz](mailto:janarjenis@kaznu.kz) (J.J.);

## Content

|                                                                                                                                                                       |           |
|-----------------------------------------------------------------------------------------------------------------------------------------------------------------------|-----------|
| <b>Supplementary data for <i>Artemisia nitrosa</i></b> .....                                                                                                          | <b>3</b>  |
| <b>Figure S1.</b> <sup>1</sup> H NMR, <sup>13</sup> C NMR and DEPT spectrum of <b>1</b> in CDCl <sub>3</sub> . ....                                                   | <b>3</b>  |
| <b>Figure S2.</b> <sup>1</sup> H NMR, <sup>13</sup> C NMR and DEPT spectrum of <b>2</b> in CD <sub>3</sub> OD .....                                                   | <b>4</b>  |
| <b>Figure S3.</b> <sup>1</sup> H NMR, <sup>13</sup> C NMR and DEPT spectrum of <b>3</b> in CDCl <sub>3</sub> . ....                                                   | <b>5</b>  |
| <b>Figure S4.</b> <sup>1</sup> H NMR, <sup>13</sup> C NMR and DEPT spectrum of <b>4</b> in CDCl <sub>3</sub> . ....                                                   | <b>6</b>  |
| <b>Figure S5.</b> <sup>1</sup> H NMR, <sup>13</sup> C NMR and DEPT spectrum of <b>5</b> in CDCl <sub>3</sub> . ....                                                   | <b>7</b>  |
| <b>Figure S6.</b> <sup>1</sup> H NMR, <sup>13</sup> C NMR and DEPT spectrum of <b>6</b> in CDCl <sub>3</sub> . ....                                                   | <b>8</b>  |
| <b>Figure S7.</b> <sup>1</sup> H NMR, <sup>13</sup> C NMR and DEPT spectrum of <b>7</b> in CDCl <sub>3</sub> . ....                                                   | <b>9</b>  |
| <b>Figure S8.</b> <sup>1</sup> H NMR, <sup>13</sup> C NMR and DEPT spectrum of <b>8</b> in CDCl <sub>3</sub> . ....                                                   | <b>10</b> |
| <b>Figure S9.</b> <sup>1</sup> H NMR, <sup>13</sup> C NMR and DEPT spectrum of <b>9</b> in CD <sub>3</sub> OD .....                                                   | <b>11</b> |
| <b>Figure S10.</b> <sup>1</sup> H NMR, <sup>13</sup> C NMR and DEPT spectrum of <b>10</b> in CDCl <sub>3</sub> .....                                                  | <b>12</b> |
| <b>Figure S11.</b> <sup>1</sup> H NMR, <sup>13</sup> C NMR, DEPT, HSQC, HMBC and <sup>1</sup> H- <sup>1</sup> H COSY spectra of <b>11</b> in CDCl <sub>3</sub> . .... | <b>13</b> |
| <b>Figure S12.</b> UV spectrum of <b>11</b> .....                                                                                                                     | <b>16</b> |
| <b>Figure S13.</b> TOFMS spectral analysis of <b>11</b> .....                                                                                                         | <b>17</b> |
| <b>Figure S14.</b> <sup>1</sup> H NMR, <sup>13</sup> C NMR and DEPT spectrum of <b>12</b> in CDCl <sub>3</sub> .....                                                  | <b>18</b> |
| <b>Supplementary data for <i>Artemisia marschalliana</i></b> .....                                                                                                    | <b>19</b> |
| <b>Figure S15.</b> <sup>1</sup> H NMR, <sup>13</sup> C NMR, DEPT, HSQC, HMBC and <sup>1</sup> H- <sup>1</sup> H COSY spectra of <b>1'</b> in CDCl <sub>3</sub> . .... | <b>19</b> |
| <b>Figure S16.</b> UV spectrum of <b>1'</b> .....                                                                                                                     | <b>22</b> |
| <b>Figure S17.</b> ESI Mass spectrum of <b>1'</b> .....                                                                                                               | <b>22</b> |
| <b>Figure S18.</b> <sup>1</sup> H NMR, <sup>13</sup> C NMR and DEPT spectrum of <b>2'</b> in Acetone d-6.....                                                         | <b>23</b> |
| <b>Figure S19.</b> <sup>1</sup> H NMR, <sup>13</sup> C NMR and DEPT spectrum of <b>3'</b> in CDCl <sub>3</sub> .....                                                  | <b>24</b> |
| <b>Figure S20.</b> <sup>1</sup> H NMR, <sup>13</sup> C NMR and DEPT spectrum of <b>4'</b> in CDCl <sub>3</sub> .....                                                  | <b>25</b> |
| <b>Figure S21.</b> <sup>1</sup> H NMR, <sup>13</sup> C NMR and DEPT spectrum of <b>5'</b> in CDCl <sub>3</sub> .....                                                  | <b>26</b> |
| <b>Figure S22.</b> <sup>1</sup> H NMR, <sup>13</sup> C NMR and DEPT spectrum of <b>6'</b> in CDCl <sub>3</sub> .....                                                  | <b>27</b> |
| <b>Figure S23.</b> <sup>1</sup> H NMR, <sup>13</sup> C NMR and DEPT spectrum of <b>7'</b> in CDCl <sub>3</sub> .....                                                  | <b>28</b> |
| <b>Figure S24.</b> <sup>1</sup> H NMR, <sup>13</sup> C NMR and DEPT spectrum of <b>8'</b> in CDCl <sub>3</sub> .....                                                  | <b>29</b> |
| <b>Figure S25.</b> <sup>1</sup> H NMR, <sup>13</sup> C NMR and DEPT spectrum of <b>9'</b> in CDCl <sub>3</sub> .....                                                  | <b>30</b> |
| <b>Figure S26.</b> <sup>1</sup> H NMR, <sup>13</sup> C NMR and DEPT spectrum of <b>10'</b> in CDCl <sub>3</sub> .....                                                 | <b>31</b> |
| <b>Figure S27.</b> <sup>1</sup> H NMR, <sup>13</sup> C NMR and DEPT spectrum of <b>11'</b> in CDCl <sub>3</sub> .....                                                 | <b>32</b> |
| <b>Figure S28.</b> <sup>1</sup> H NMR, <sup>13</sup> C NMR and DEPT spectrum of <b>12'</b> in CDCl <sub>3</sub> .....                                                 | <b>33</b> |
| <b>Figure S29.</b> <sup>1</sup> H NMR, <sup>13</sup> C NMR and DEPT spectrum of <b>13'</b> in CDCl <sub>3</sub> .....                                                 | <b>34</b> |
| <b>Figure S30.</b> Inhibitory Effects of <i>A.nitrosa</i> compounds on LPS-Enhanced Inflammatory Mediators .....                                                      | <b>35</b> |
| <b>Figure S31.</b> Picture of the whole plant of <i>Artemisia nitrosa</i> .....                                                                                       | <b>36</b> |
| <b>Figure S32.</b> Picture of the whole plant of <i>Artemisia marschalliana</i> .....                                                                                 | <b>36</b> |

### Supplementary data for *Artemisia nitrosa*

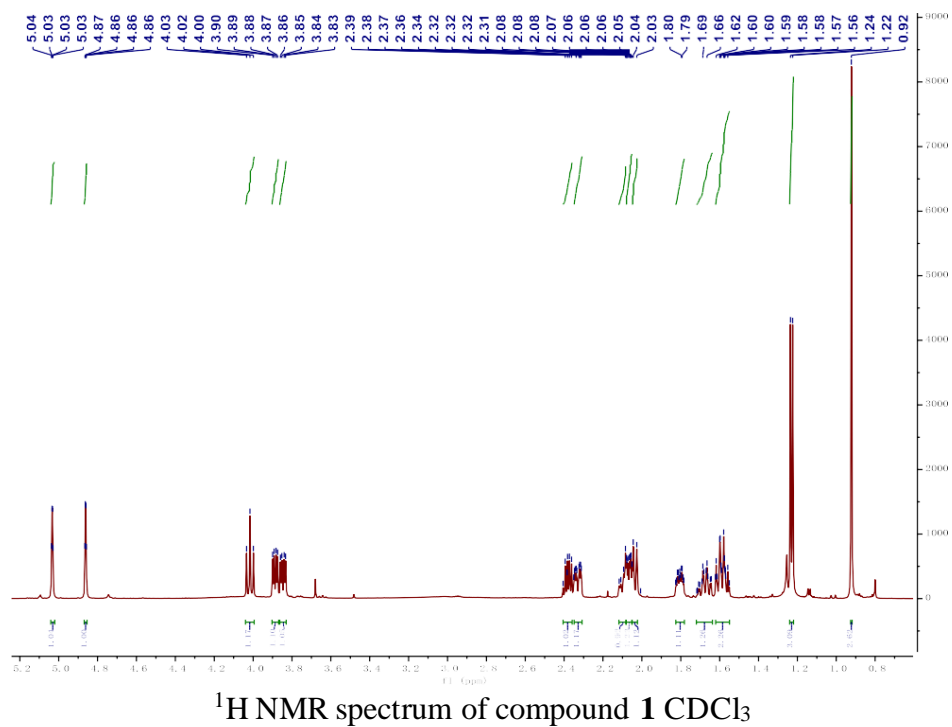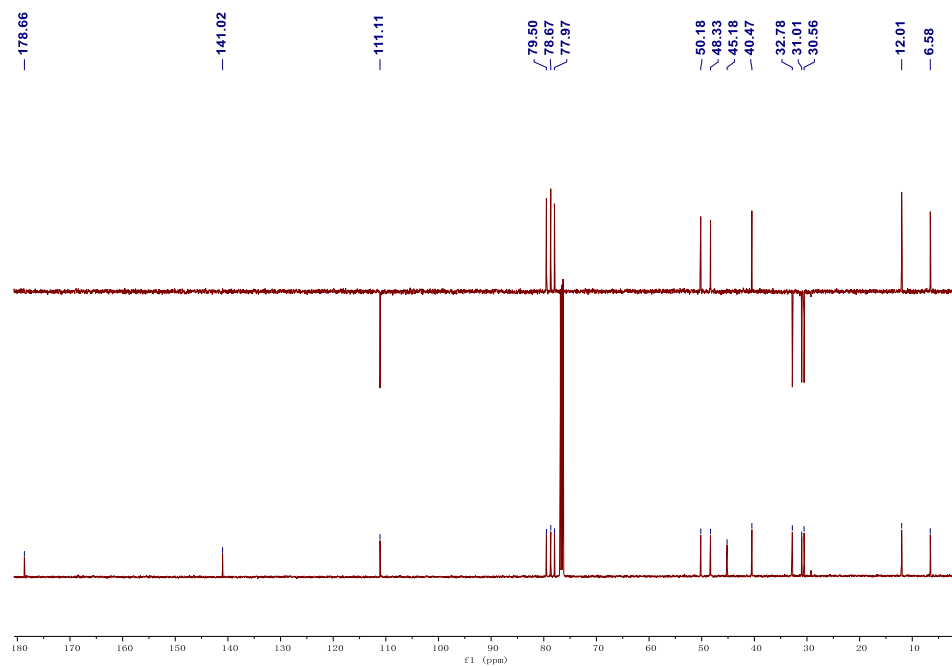

<sup>13</sup>C NMR, DEPT spectrum of **1** in CDCl<sub>3</sub>

**Figure S1.** <sup>1</sup>H NMR, <sup>13</sup>C NMR, DEPT spectrum of **1** in CDCl<sub>3</sub>

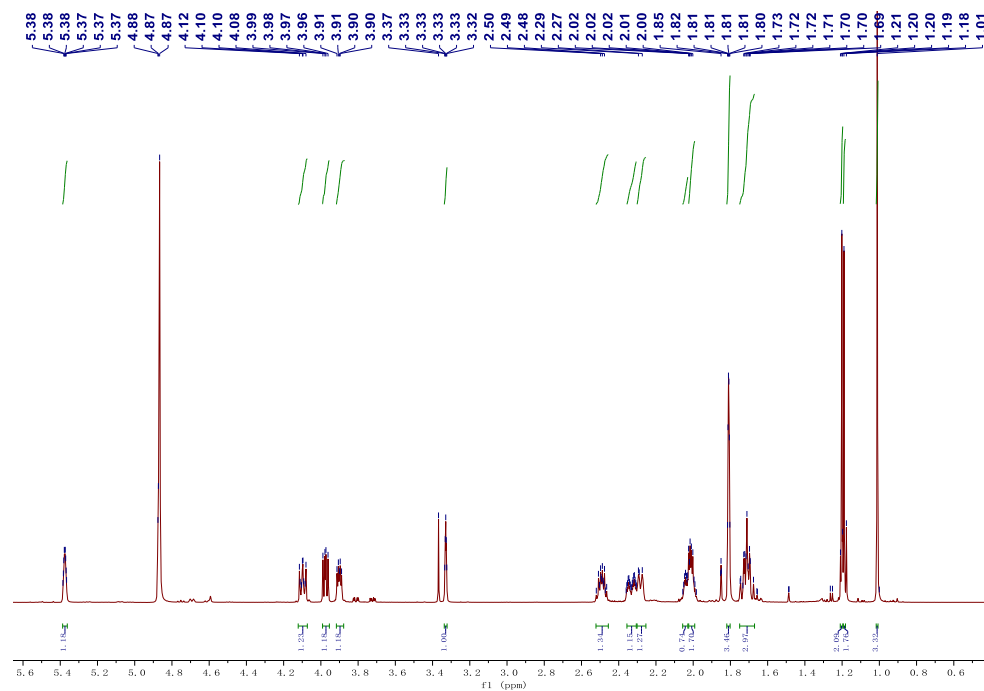

<sup>1</sup>H NMR spectrum of **2** in CD<sub>3</sub>OD.

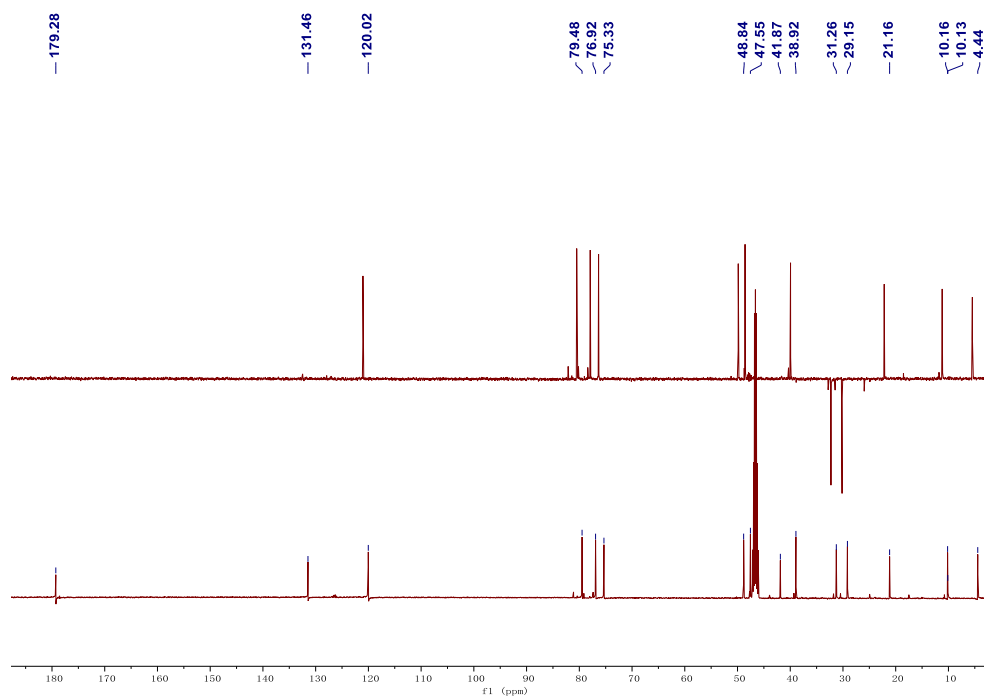

<sup>13</sup>C NMR, DEPT spectrum of **2** in CD<sub>3</sub>OD.

**Figure S2.** <sup>1</sup>H NMR, <sup>13</sup>C NMR, DEPT spectrum of **2** in CD<sub>3</sub>OD.

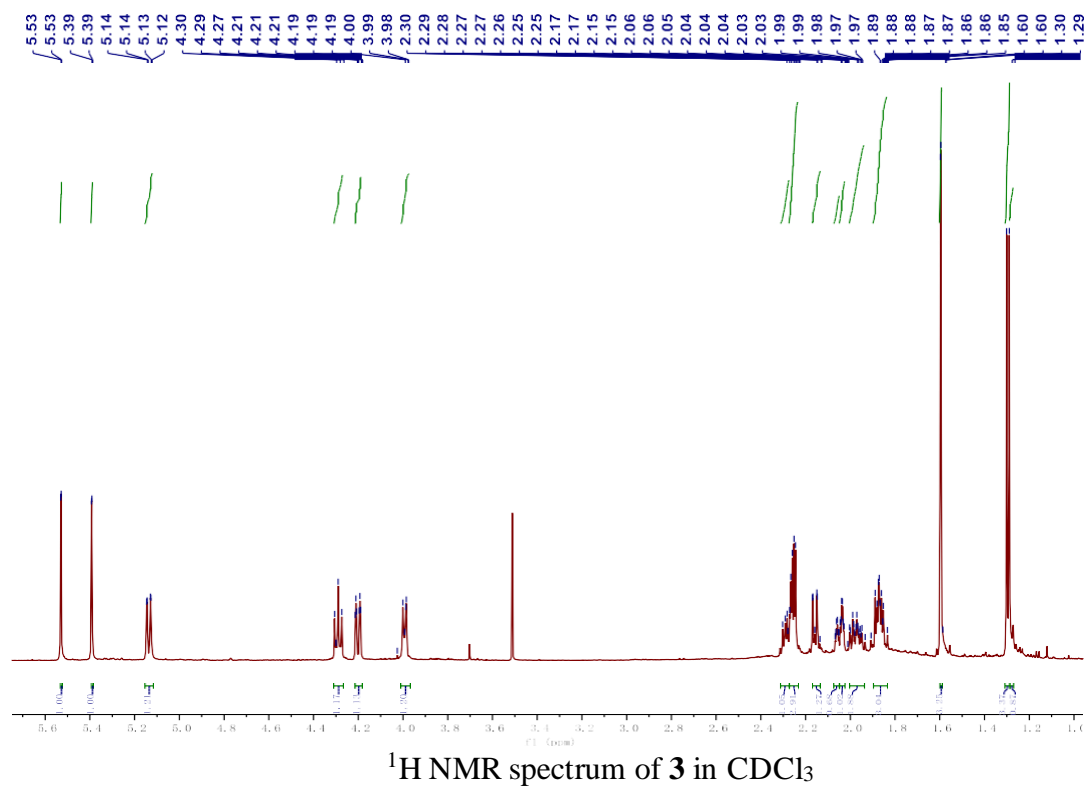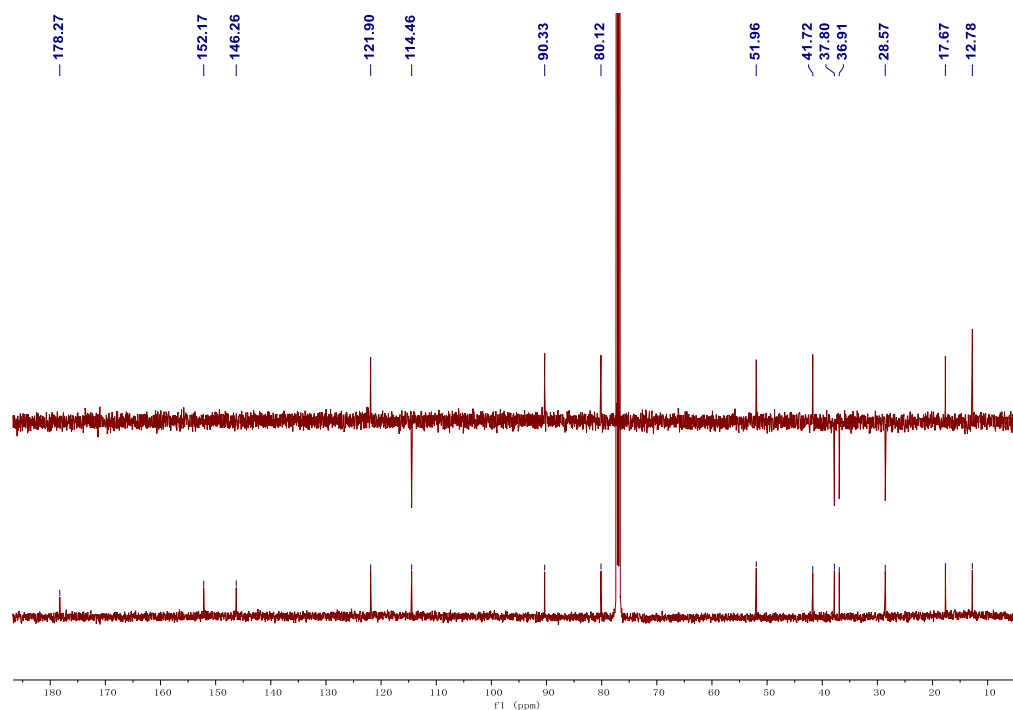

**Figure S3.**  $^1\text{H}$  NMR,  $^{13}\text{C}$  NMR, DEPT spectrum of **3** in  $\text{CDCl}_3$ .

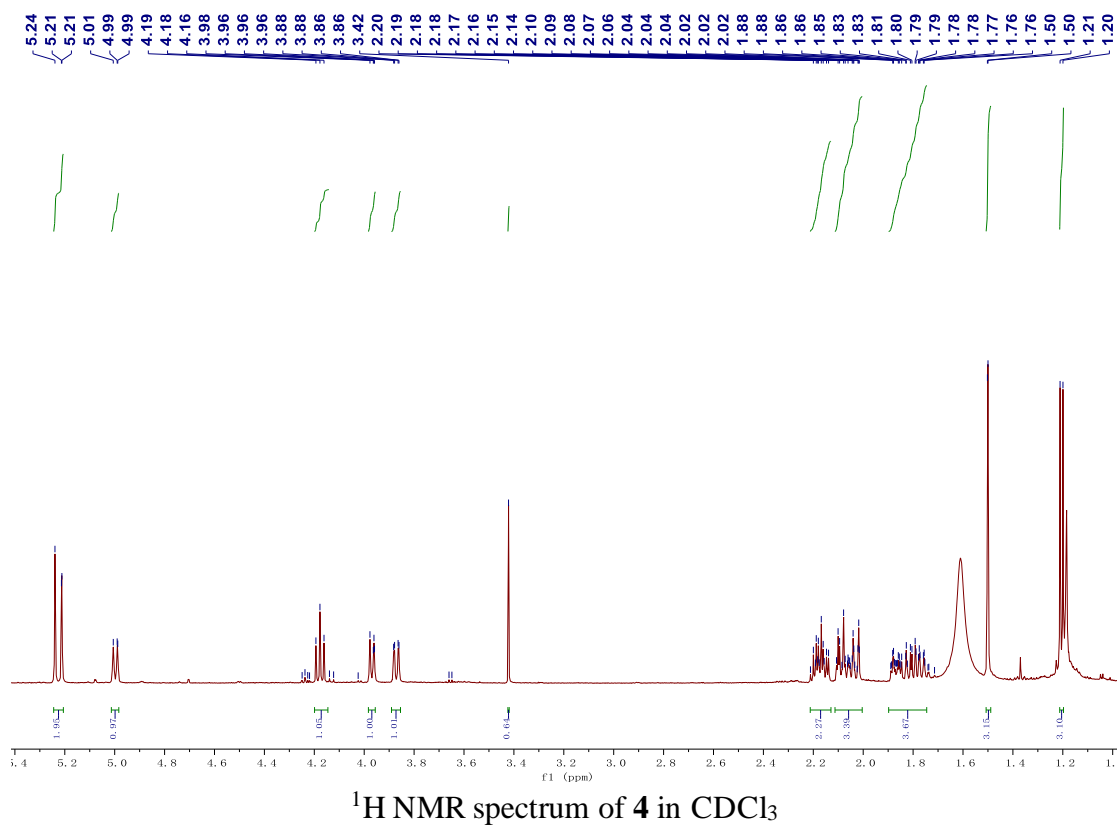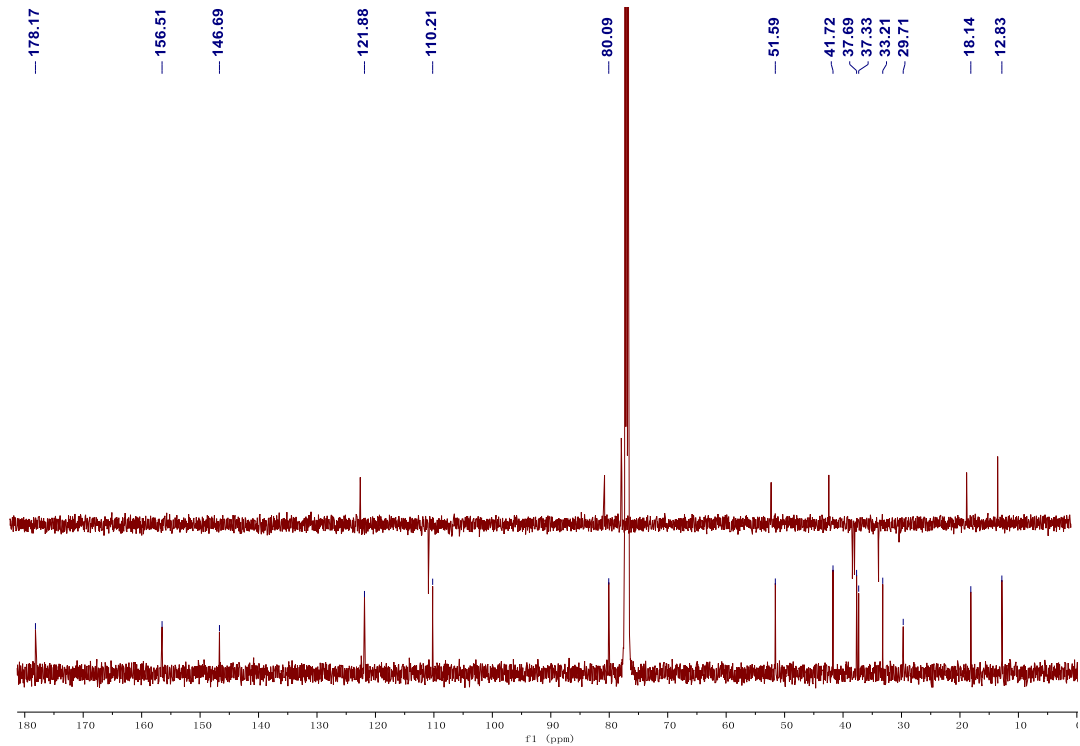

$^{13}\text{C}$  NMR, DEPT spectrum of **4** in  $\text{CDCl}_3$   
**Figure S4.**  $^1\text{H}$  NMR,  $^{13}\text{C}$  NMR, DEPT spectrum of **4** in  $\text{CDCl}_3$ .

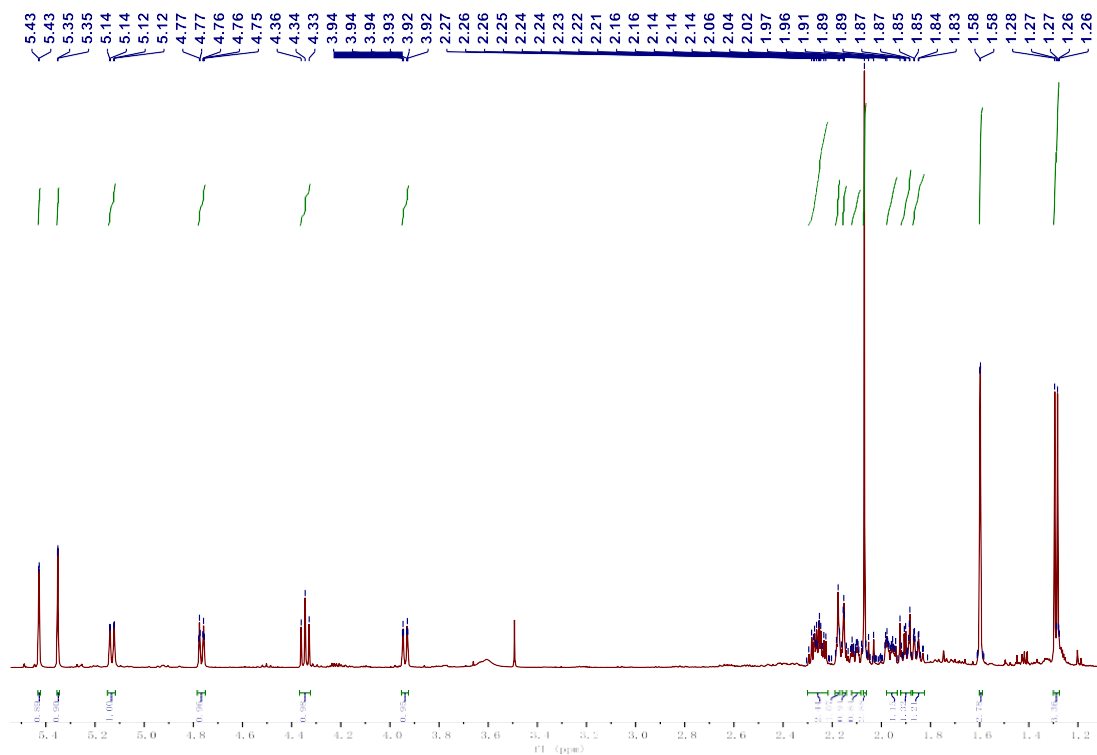

<sup>1</sup>H NMR spectrum of **5** in CDCl<sub>3</sub>

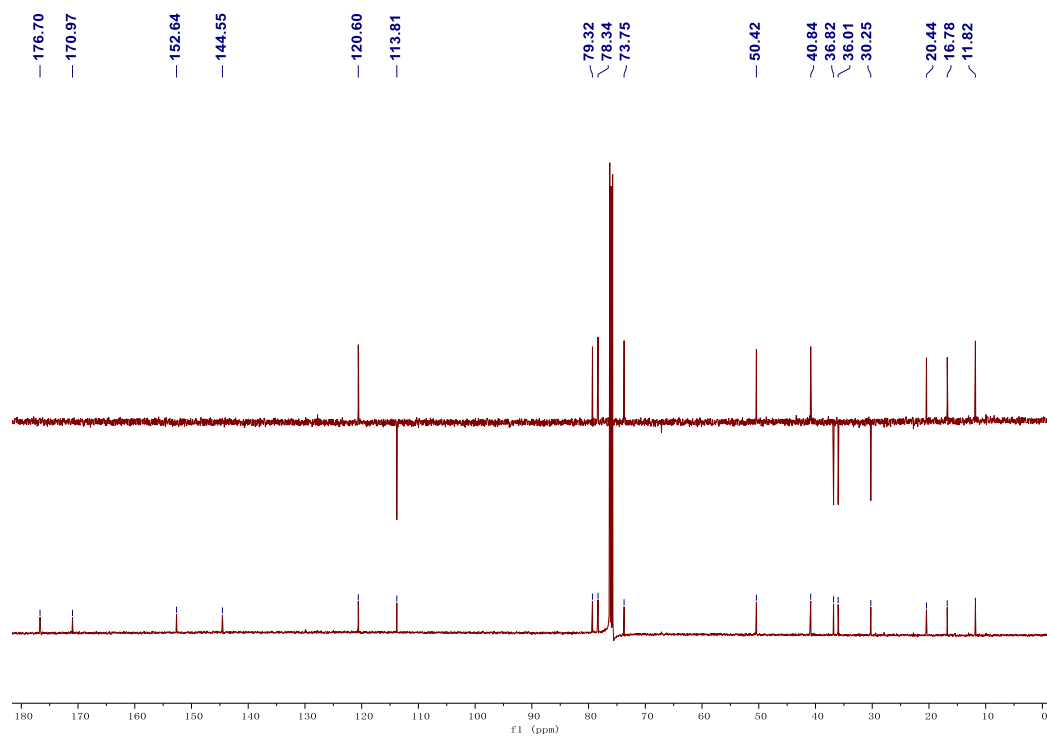

<sup>13</sup>C NMR, DEPT spectrum of **5** in CDCl<sub>3</sub>.

**Figure S5.** <sup>1</sup>H NMR, <sup>13</sup>C NMR, DEPT spectrum of **5** in CDCl<sub>3</sub>.

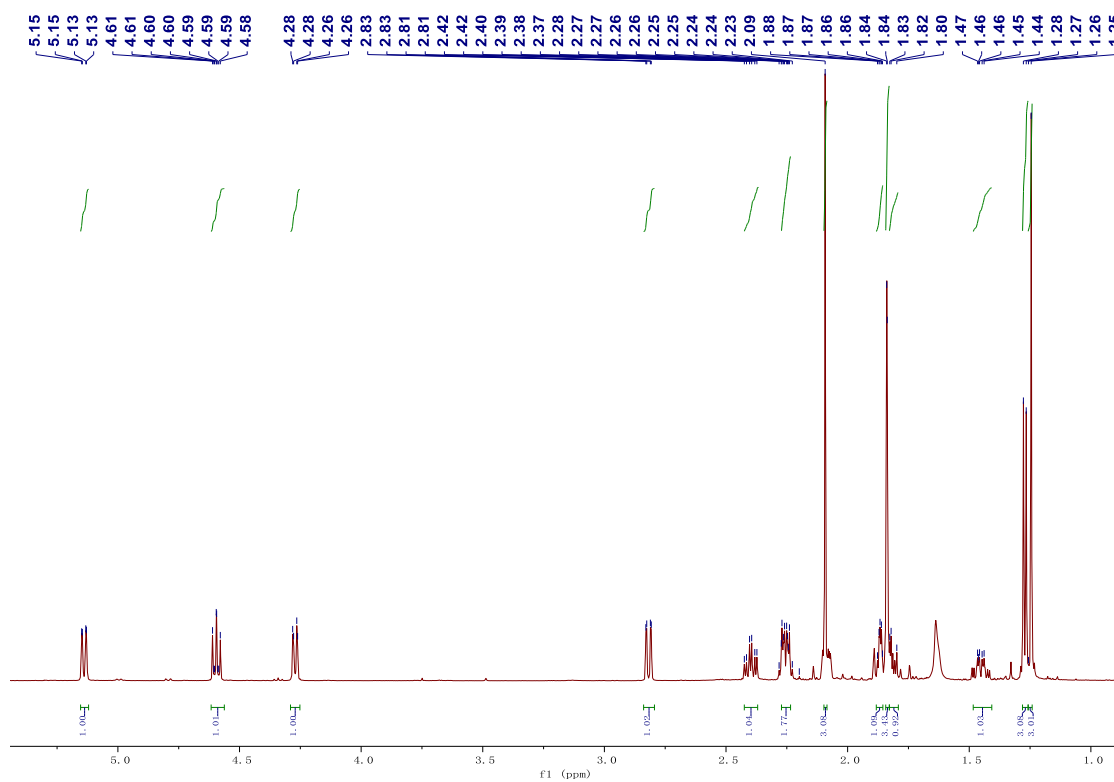

<sup>1</sup>H NMR spectrum of **6** in CDCl<sub>3</sub>

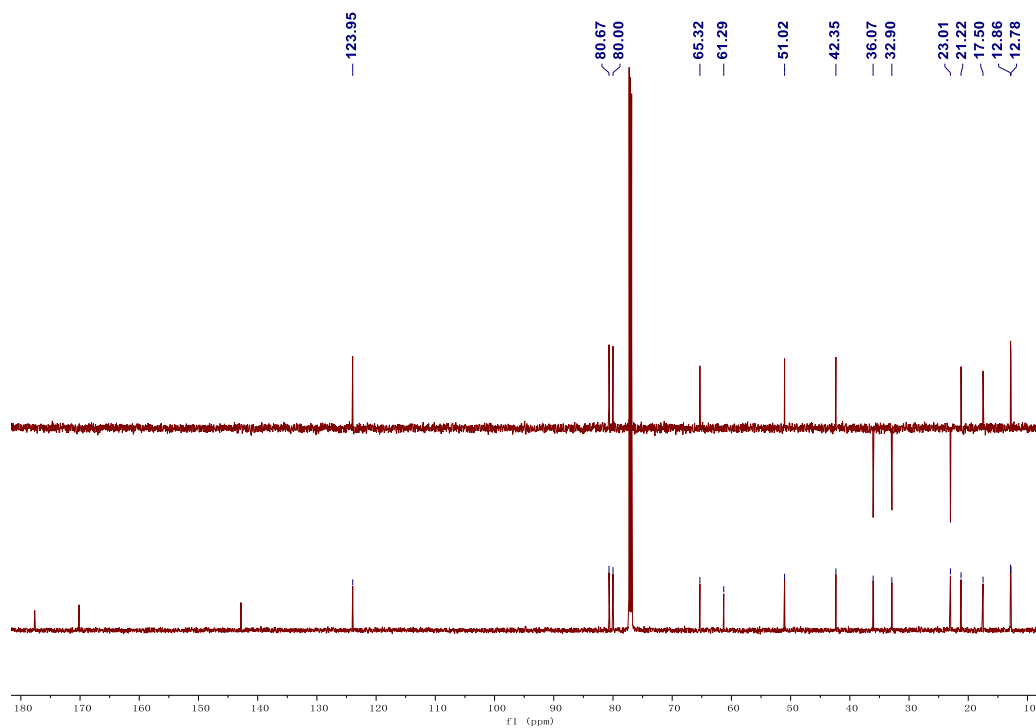

<sup>13</sup>C NMR, DEPT spectrum of **6** in CDCl<sub>3</sub>.

**Figure S6.** <sup>1</sup>H NMR, <sup>13</sup>C NMR, DEPT spectrum of **6** in CDCl<sub>3</sub>.



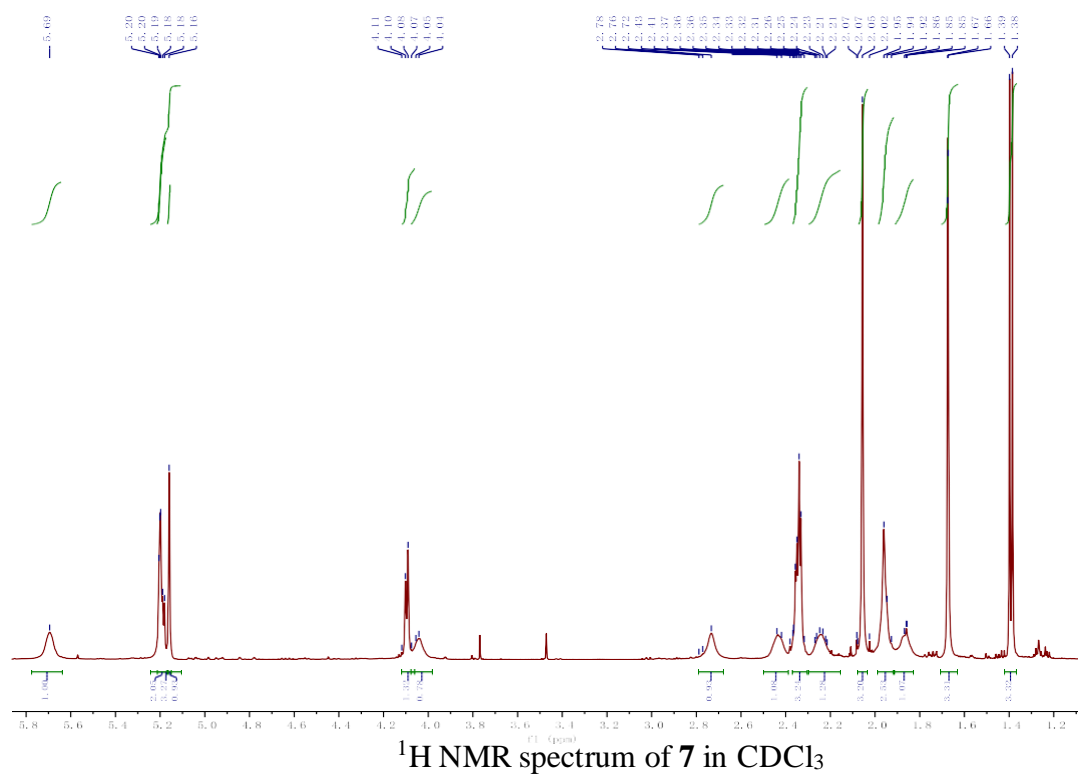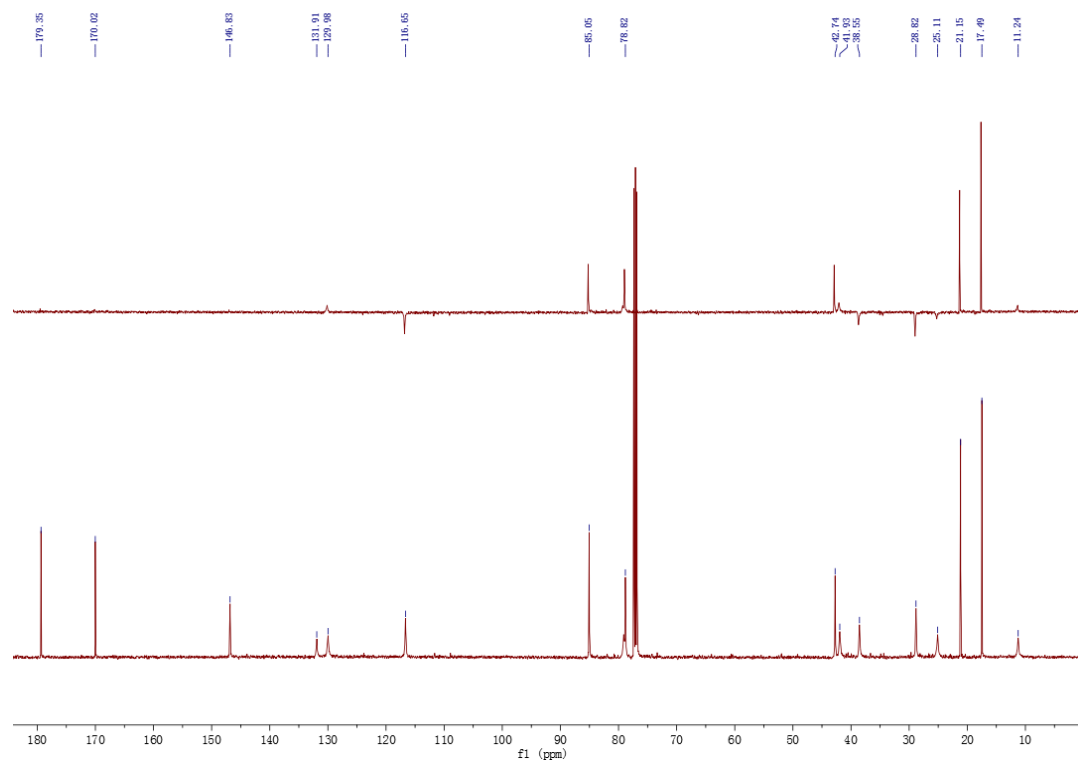

**Figure S7.**  $^1\text{H}$  NMR,  $^{13}\text{C}$  NMR, DEPT spectrum of **7** in  $\text{CDCl}_3$

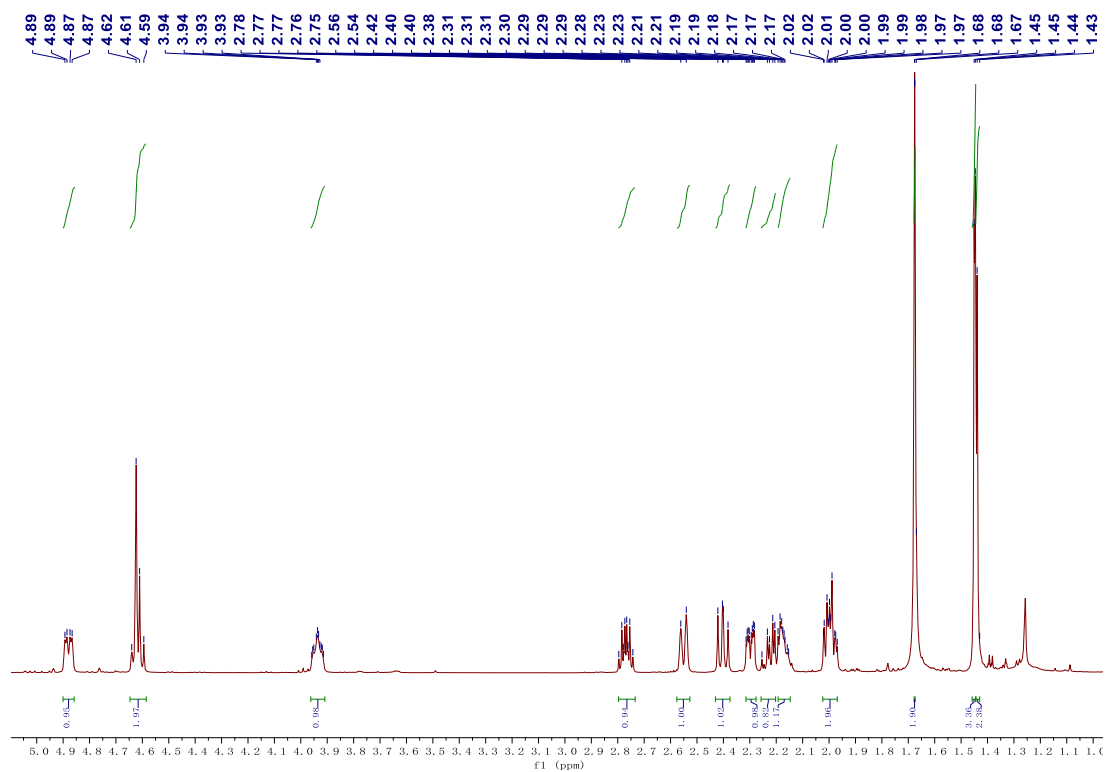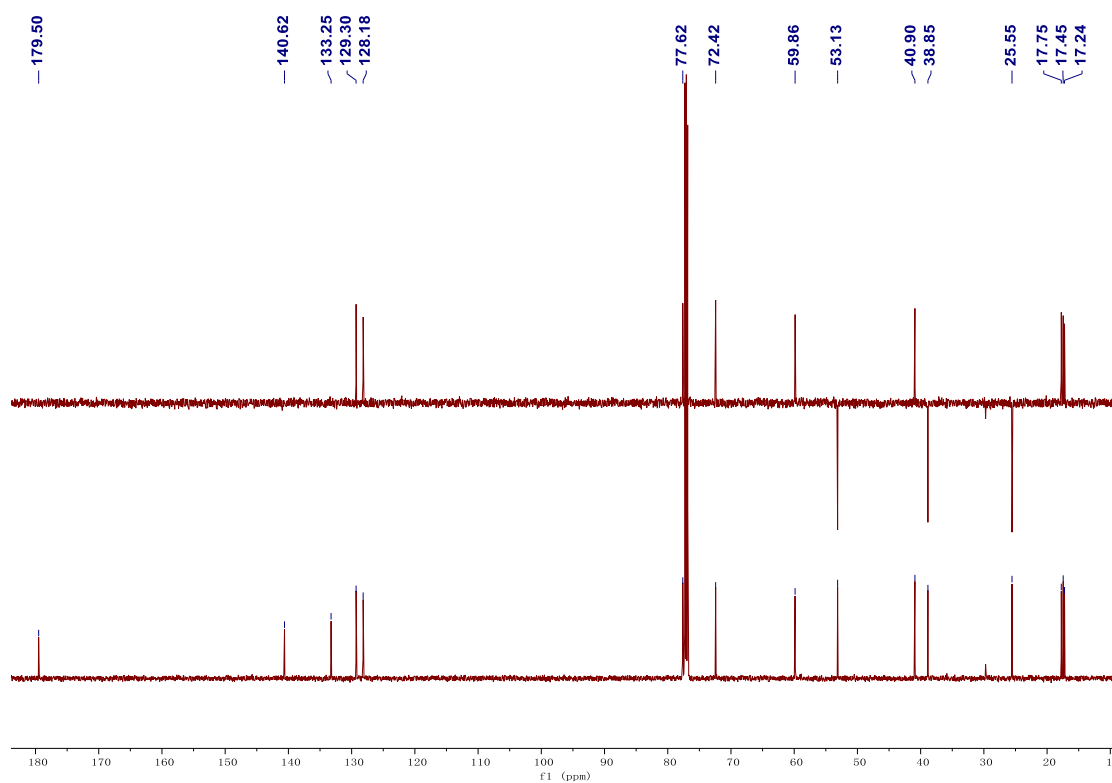

$^{13}\text{C}$  NMR, DEPT spectrum of **8** in  $\text{CDCl}_3$ .  
**Figure S8.**  $^1\text{H}$  NMR,  $^{13}\text{C}$  NMR, DEPT spectrum of **8** in  $\text{CDCl}_3$ .



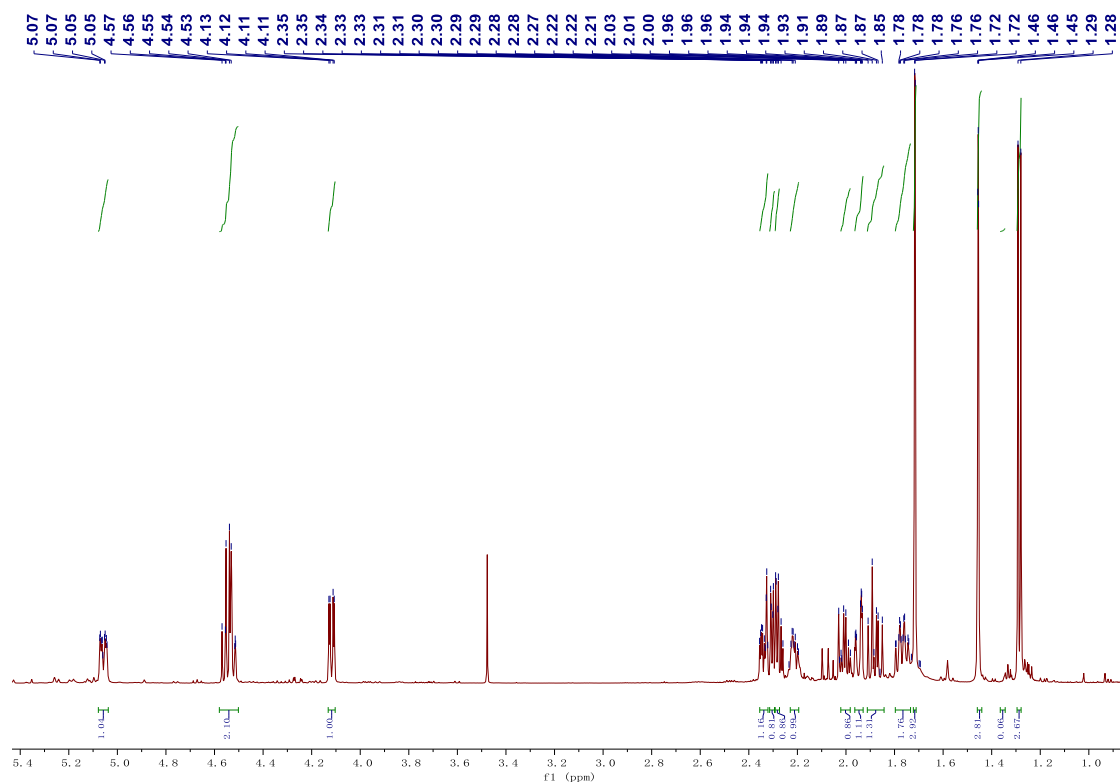

<sup>1</sup>H NMR spectrum of compound **10** in CDCl<sub>3</sub>.

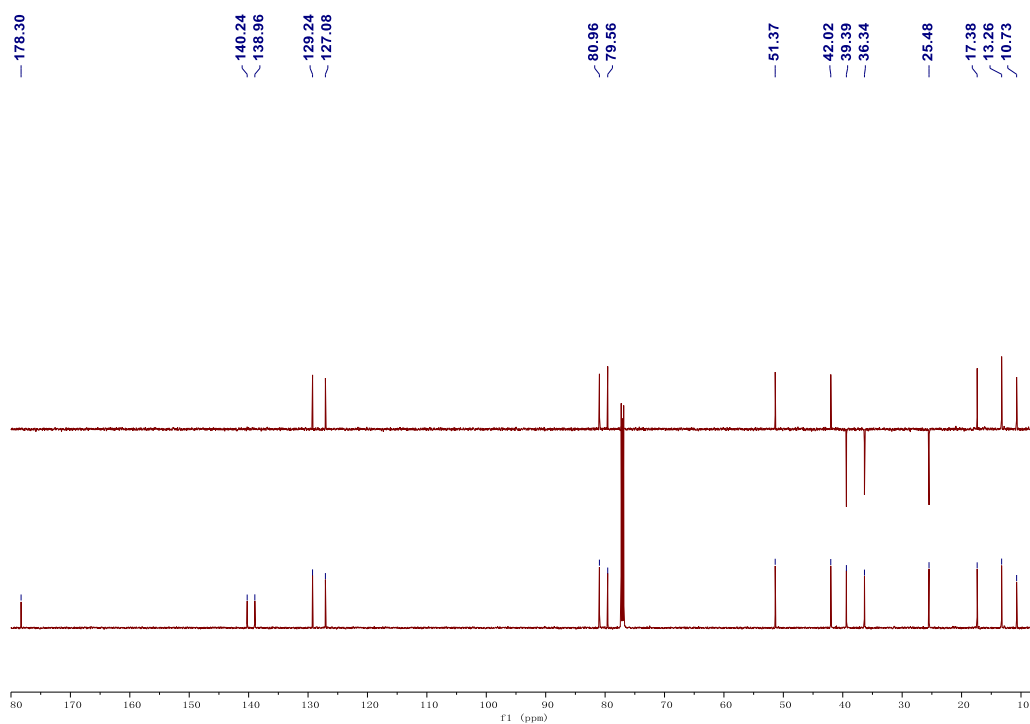

<sup>13</sup>C NMR, DEPT spectrum of compound **10** in CDCl<sub>3</sub>

**Figure S10.** <sup>1</sup>H NMR, <sup>13</sup>C NMR, DEPT spectrum of compound **10** in CDCl<sub>3</sub>.

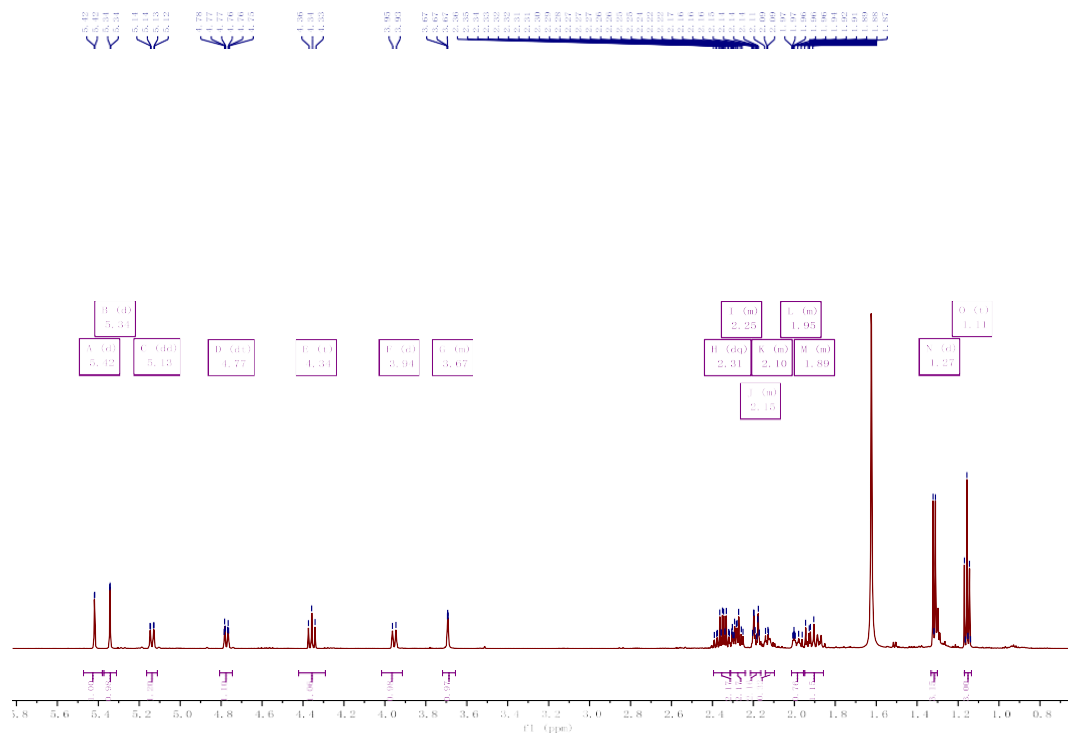

<sup>1</sup>H NMR of Compound 11

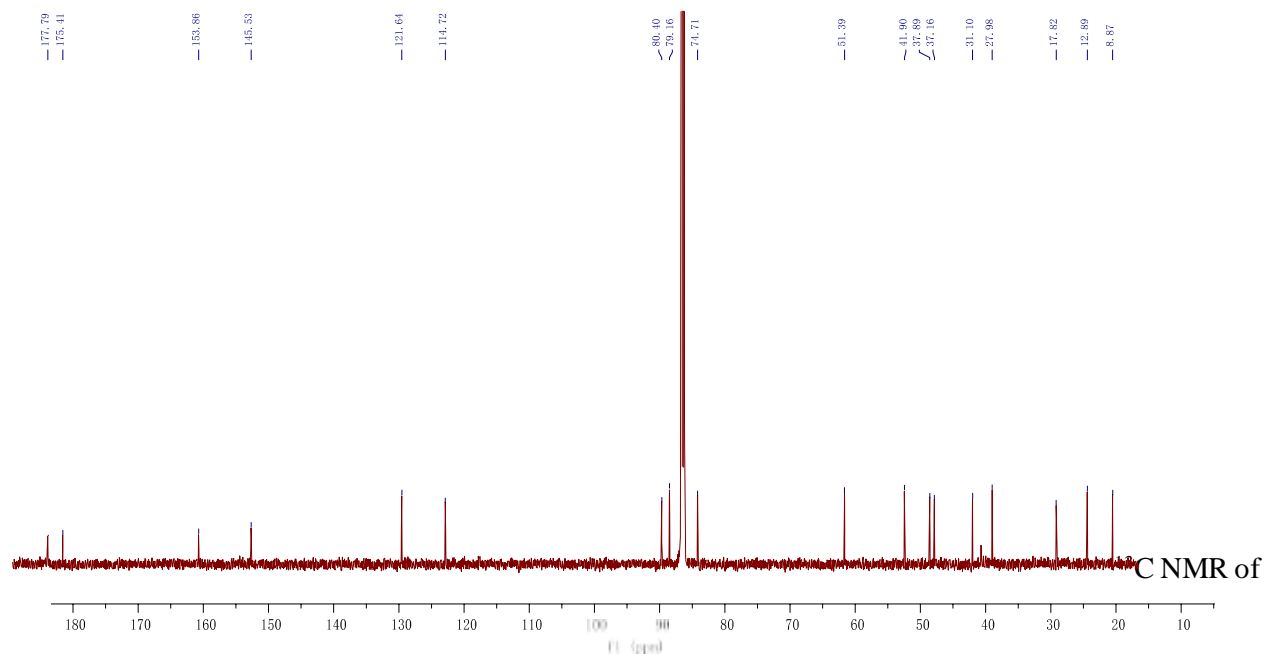

Compound 11

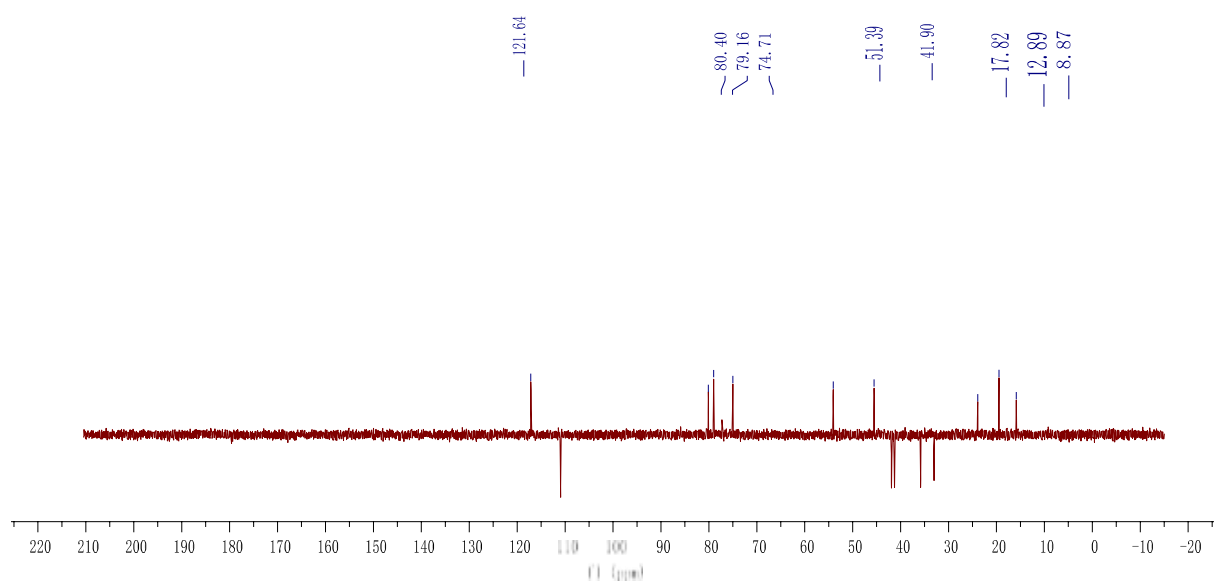

DEPT of Compound **11**

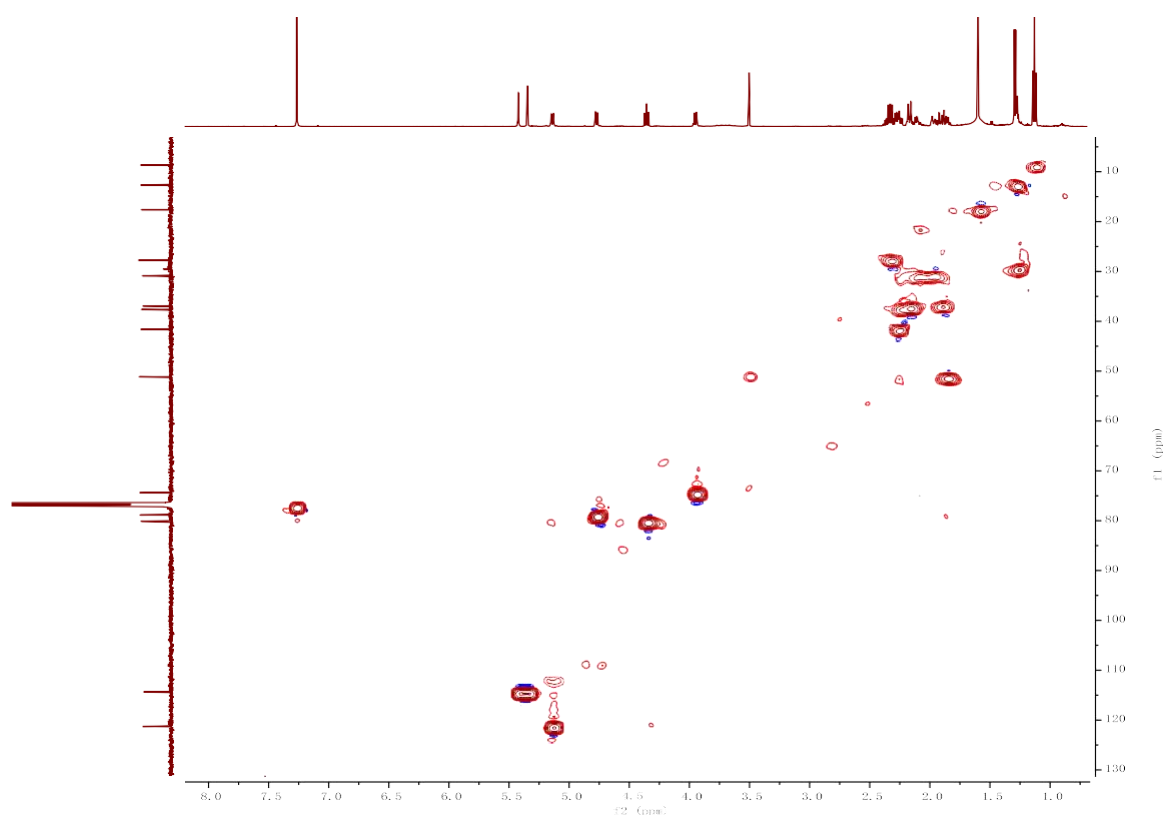

HSQC of Compound **11**

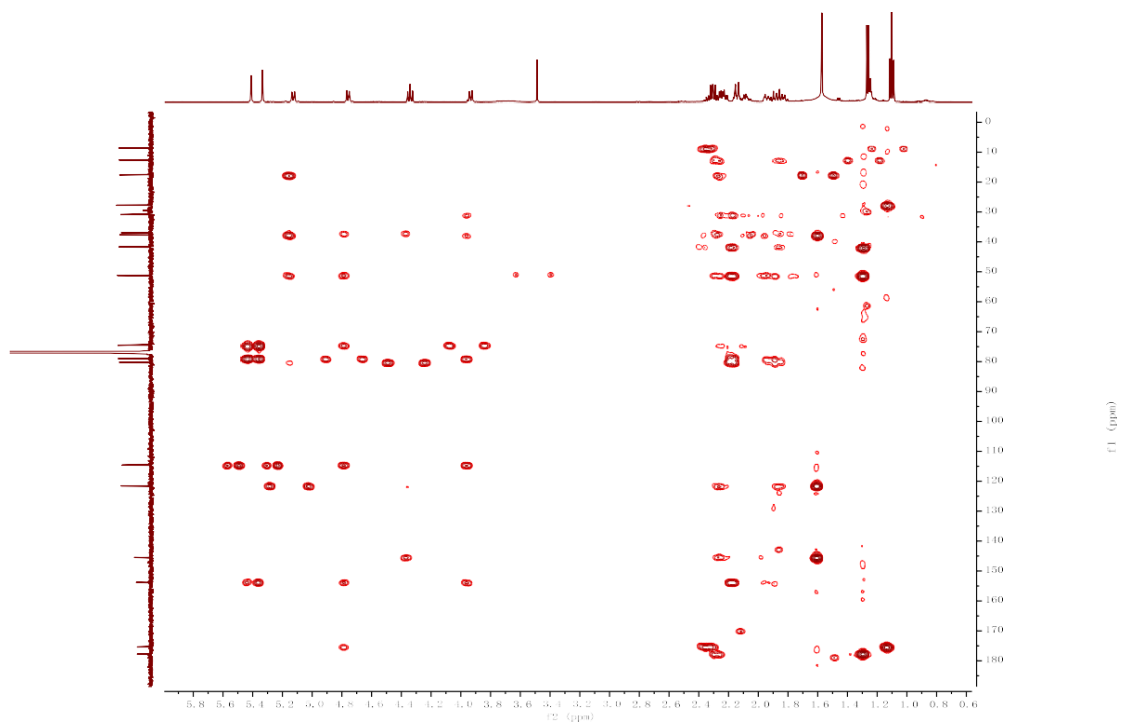

HMBC of Compound **11**

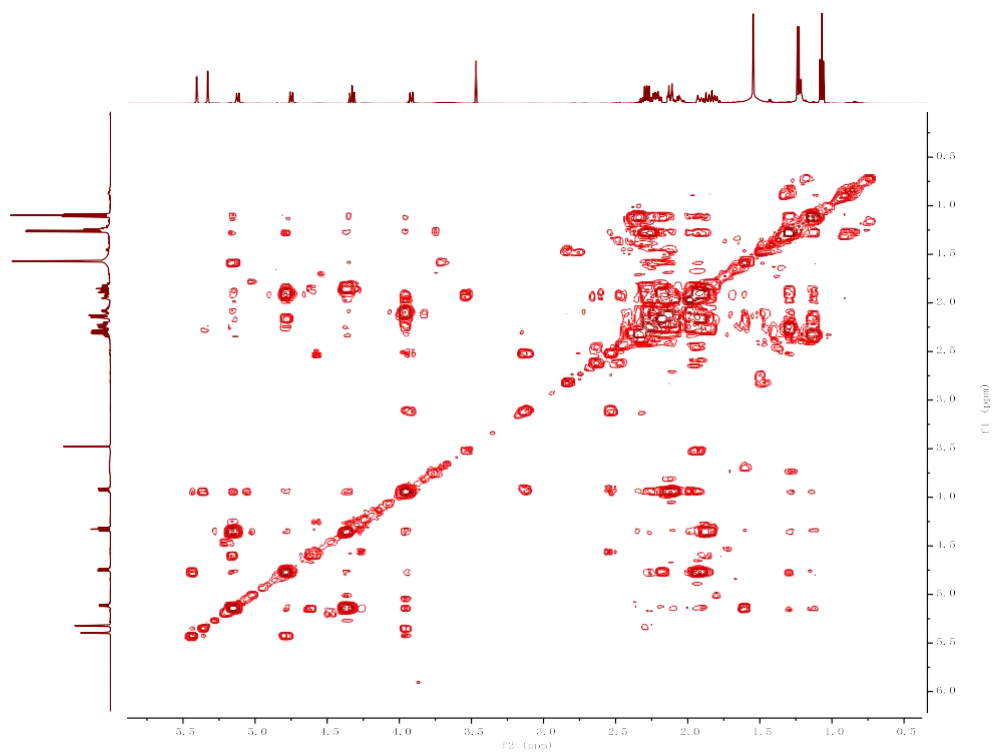

$^1\text{H}$ - $^1\text{H}$  COSY of Compound

**Figure S11.**  $^1\text{H}$  NMR,  $^{13}\text{C}$  NMR, DEPT, HSQC, HMBC and  $^1\text{H}$ - $^1\text{H}$  COSY spectra of **11** in  $\text{CDCl}_3$

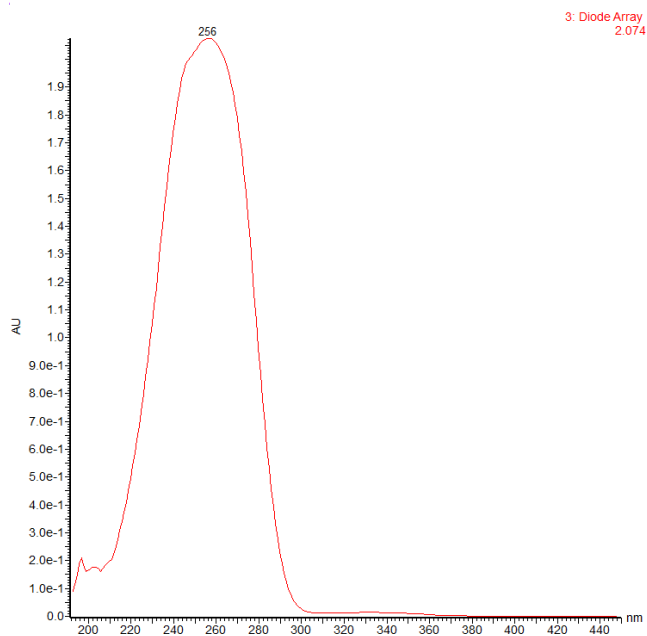

**Figure S12.** UV spectrum of **11** in MeOH.

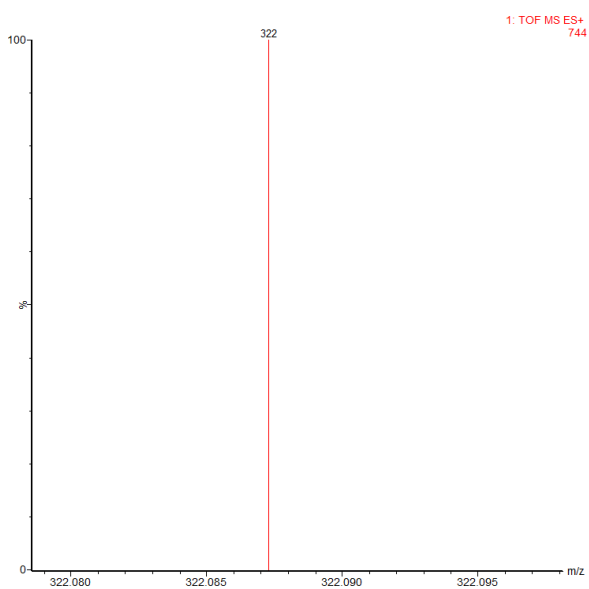

**Figure S13.** TOFMS spectral analysis of **11**.



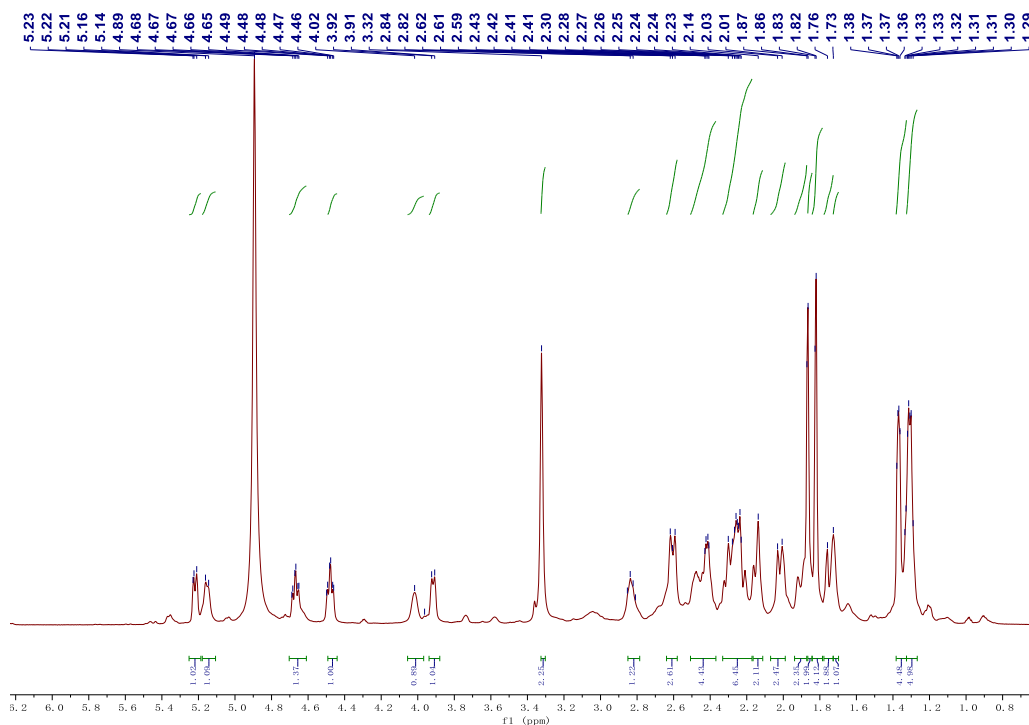

<sup>1</sup>H NMR spectrum of **12** in CDCl<sub>3</sub>.

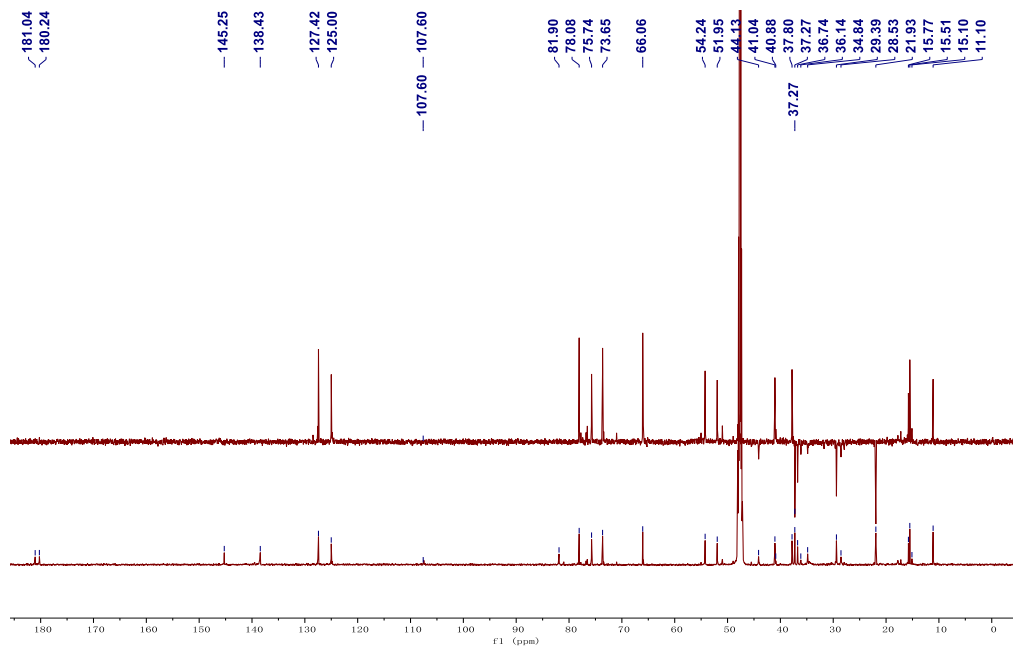

<sup>13</sup>C NMR and DEPT spectrum of **12** in CDCl<sub>3</sub>

**Figure S14.** <sup>1</sup>H NMR, <sup>13</sup>C NMR, and DEPT spectrum of **12** in CDCl<sub>3</sub>.

Supplementary data for *Artemisia marschalliana*

$^1\text{H}$  NMR of Compound **1'**

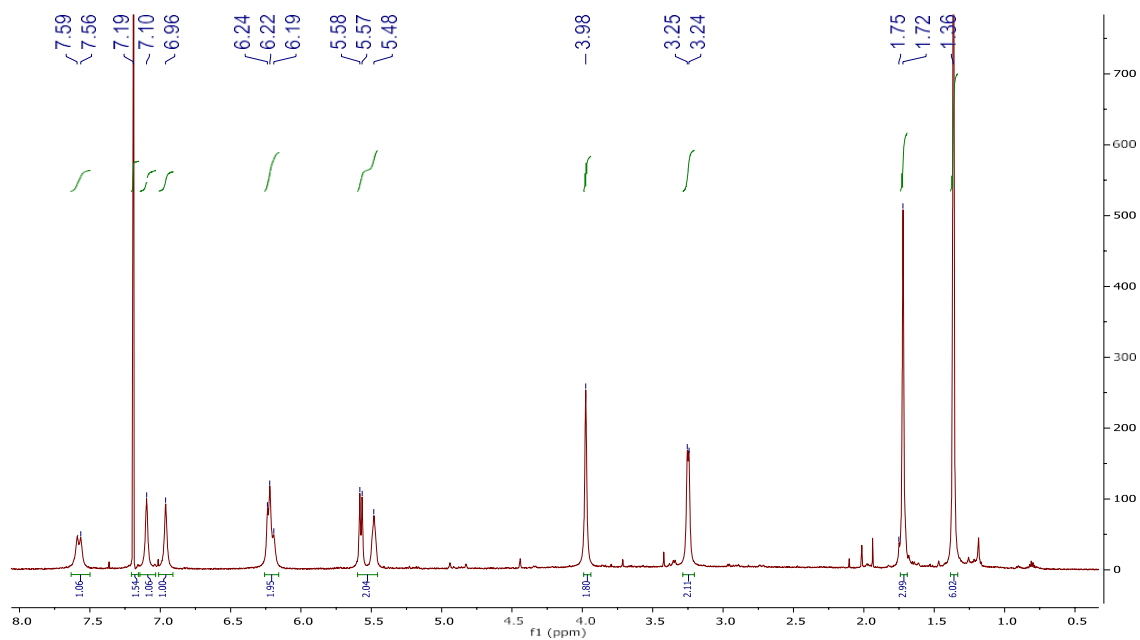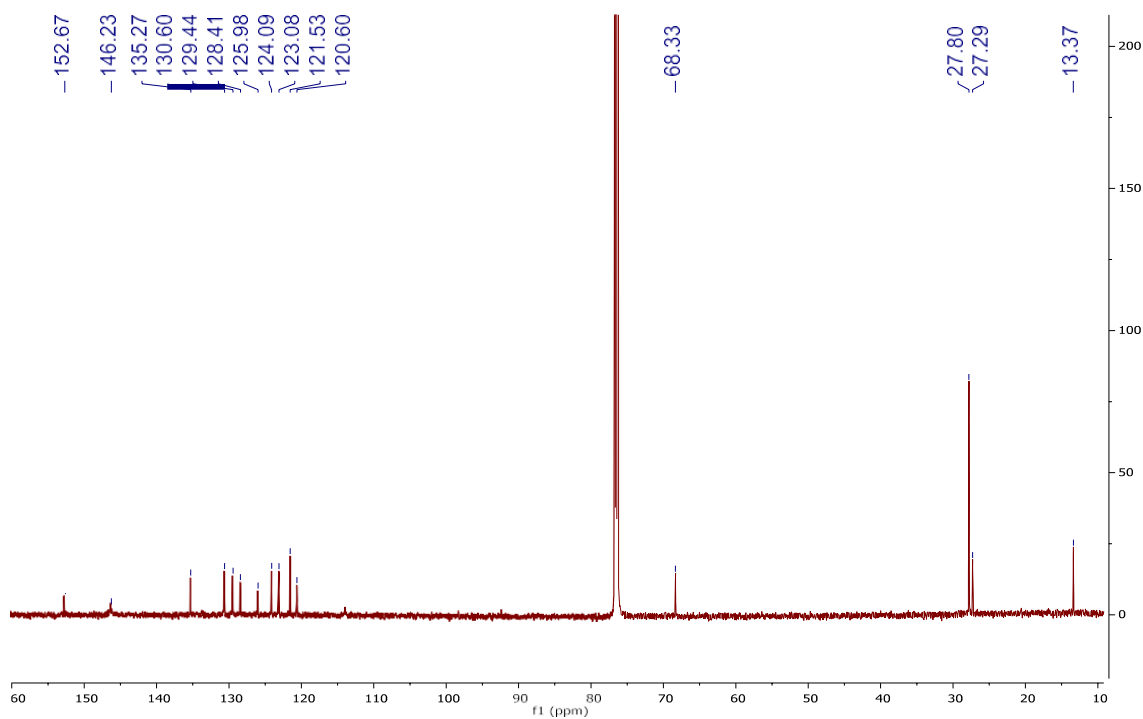

$^{13}\text{C}$  NMR of Compound **1'**

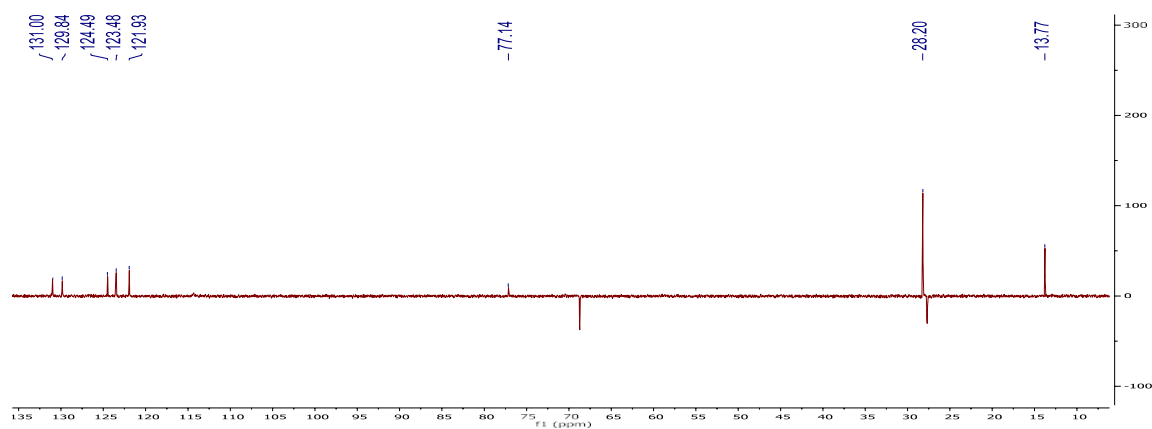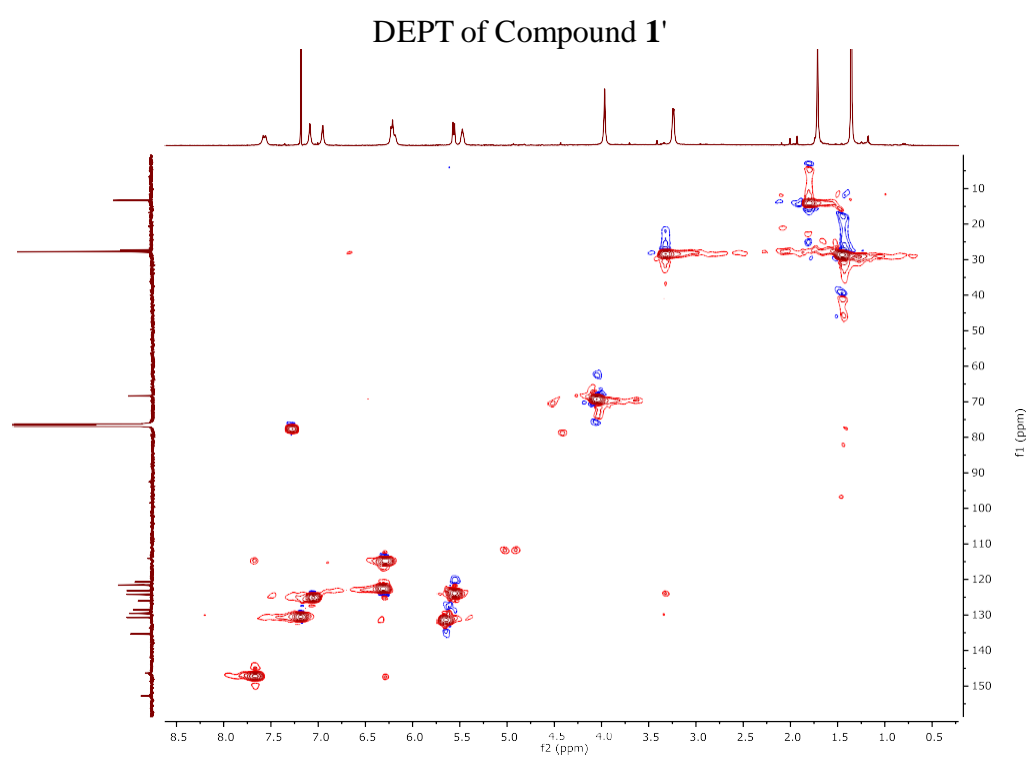

HSQC of Compound 1'

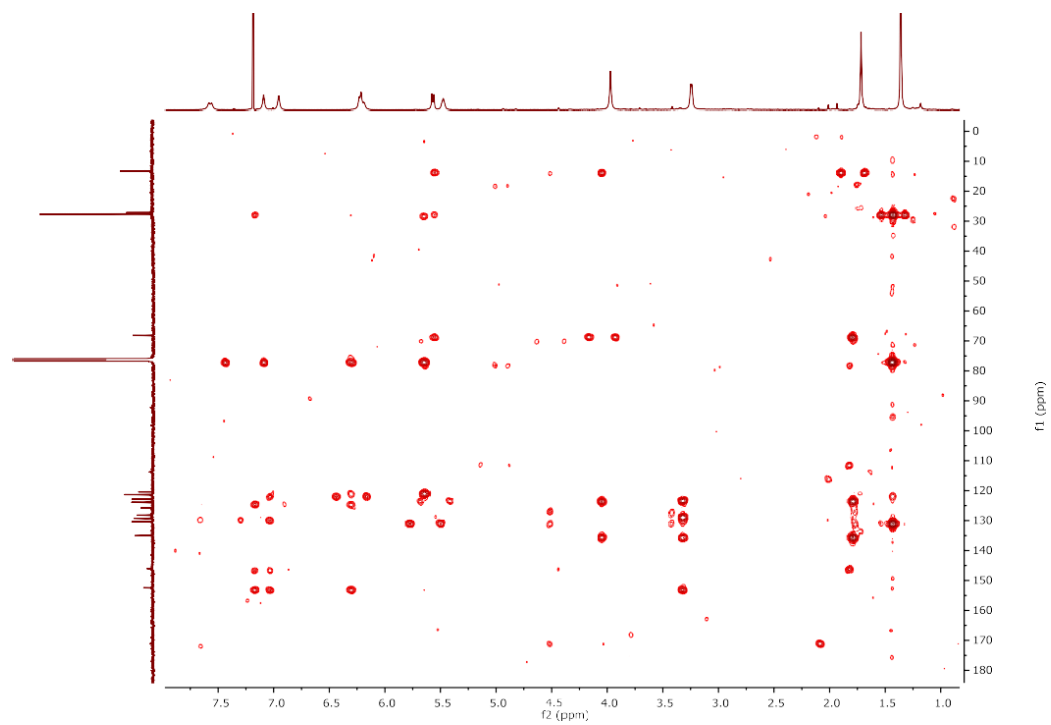

HMBC spectra of compound **1'**

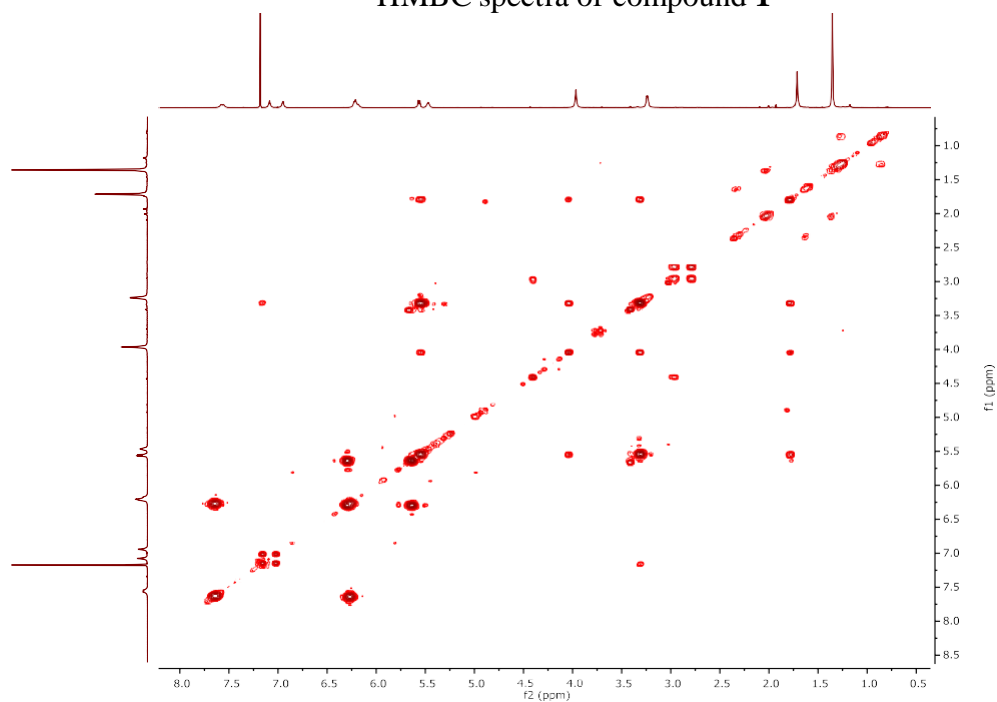

$^1\text{H}$ - $^1\text{H}$  COSY spectra of compound **1'**

**Figure S15.**  $^1\text{H}$  NMR,  $^{13}\text{C}$  NMR, DEPT, HSQC, HMBC and  $^1\text{H}$ - $^1\text{H}$  COSY spectra of **1'** in  $\text{CDCl}_3$

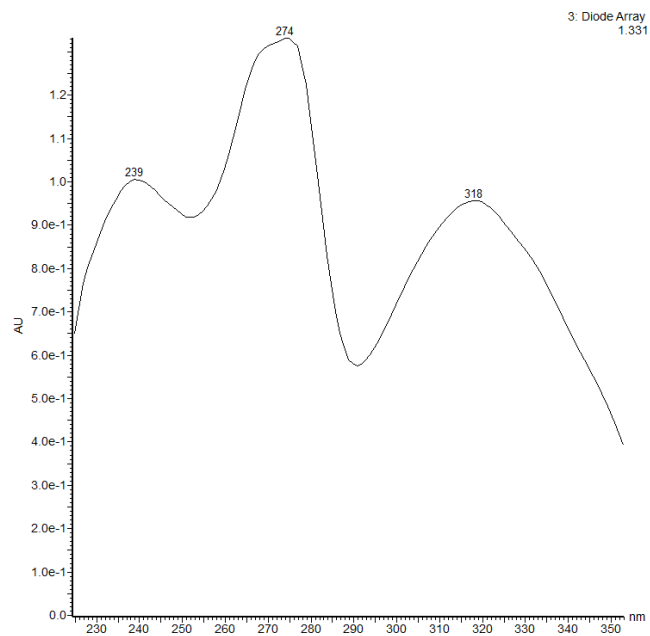

**Figure S16.** UV spectrum of Compound **1'** in MeOH.

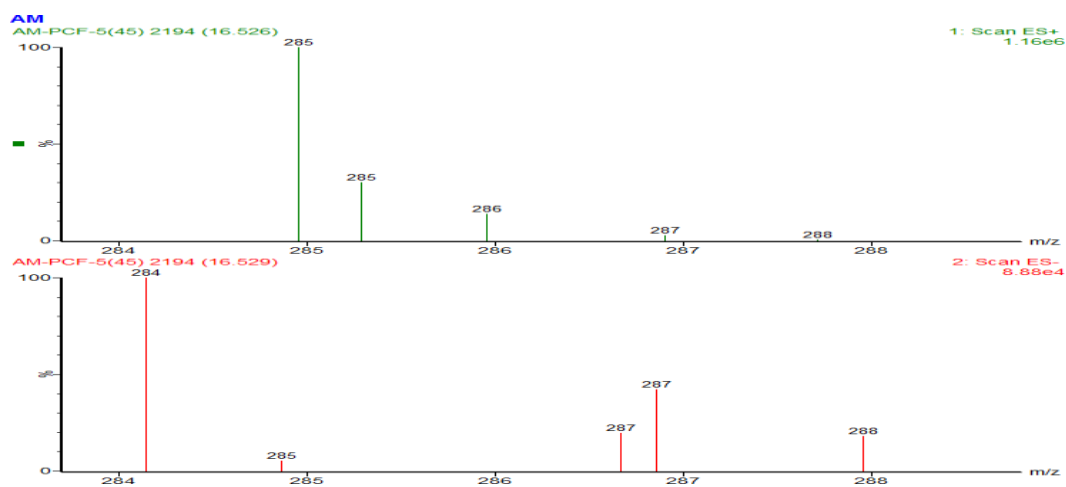

**Figure S17.** ESI-MS spectrum of Compound **1'**.

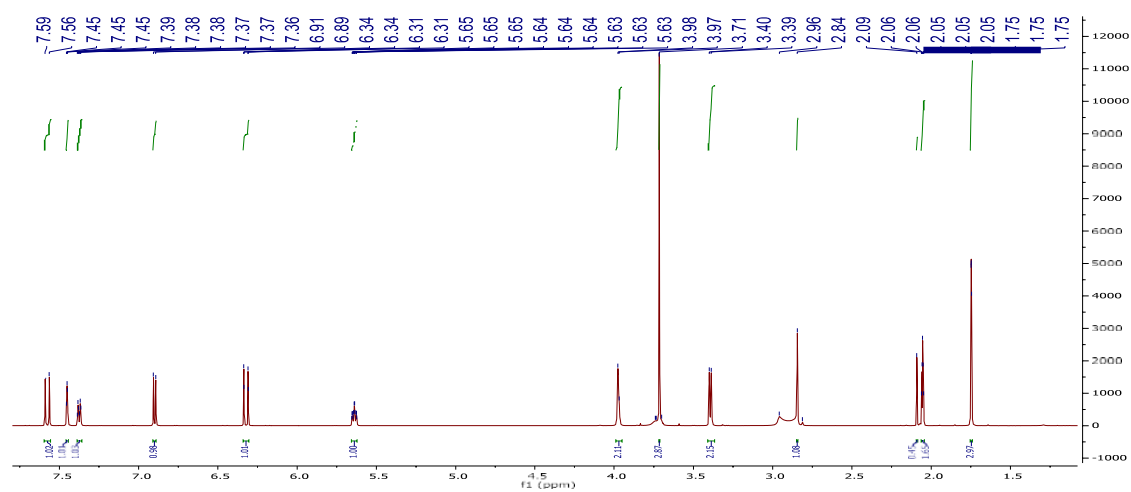

$^1\text{H}$  NMR spectrum of **2'** in Acetone d-6

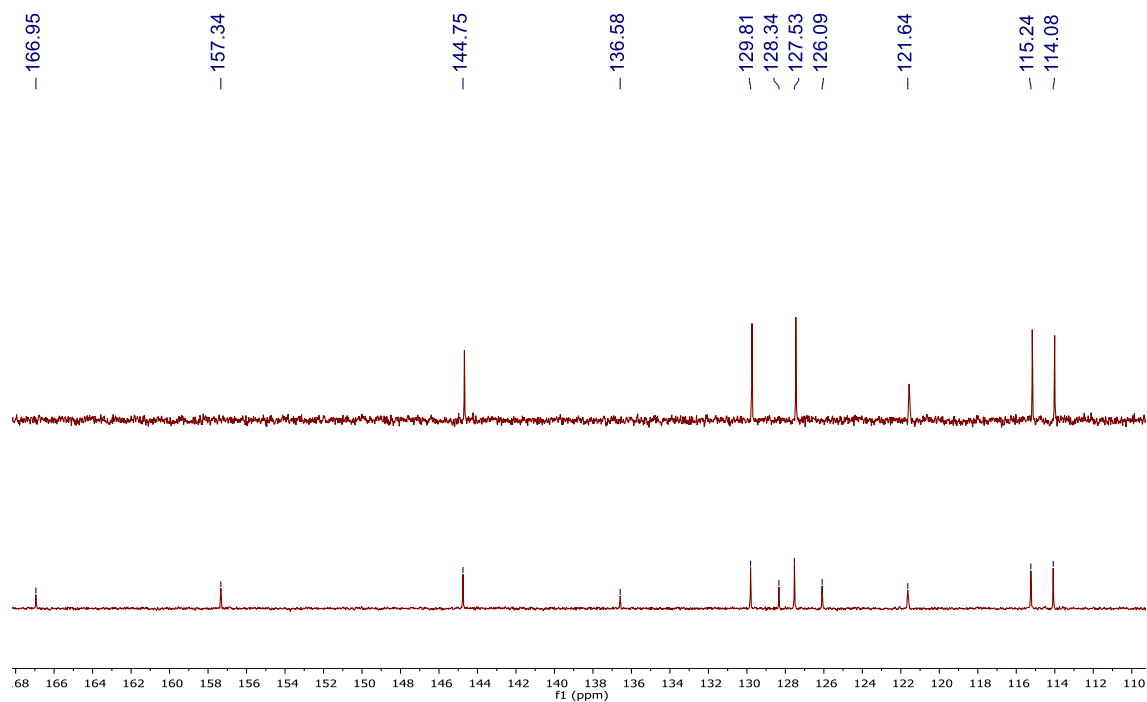

$^{13}\text{C}$  NMR, DEPT spectrum of **2'** in Acetone d-6.

**Figure S18.**  $^1\text{H}$  NMR,  $^{13}\text{C}$  NMR, DEPT spectrum of **2'** in Acetone d-6.

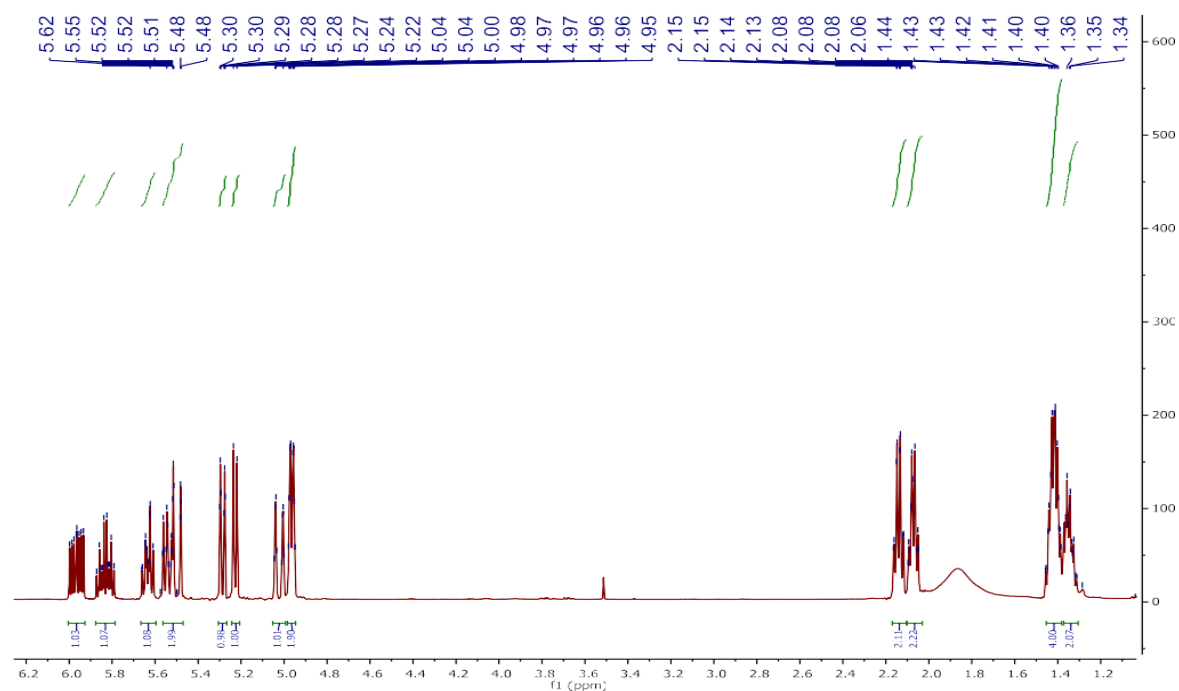

<sup>1</sup>H NMR spectrum of **3'** in CDCl<sub>3</sub>

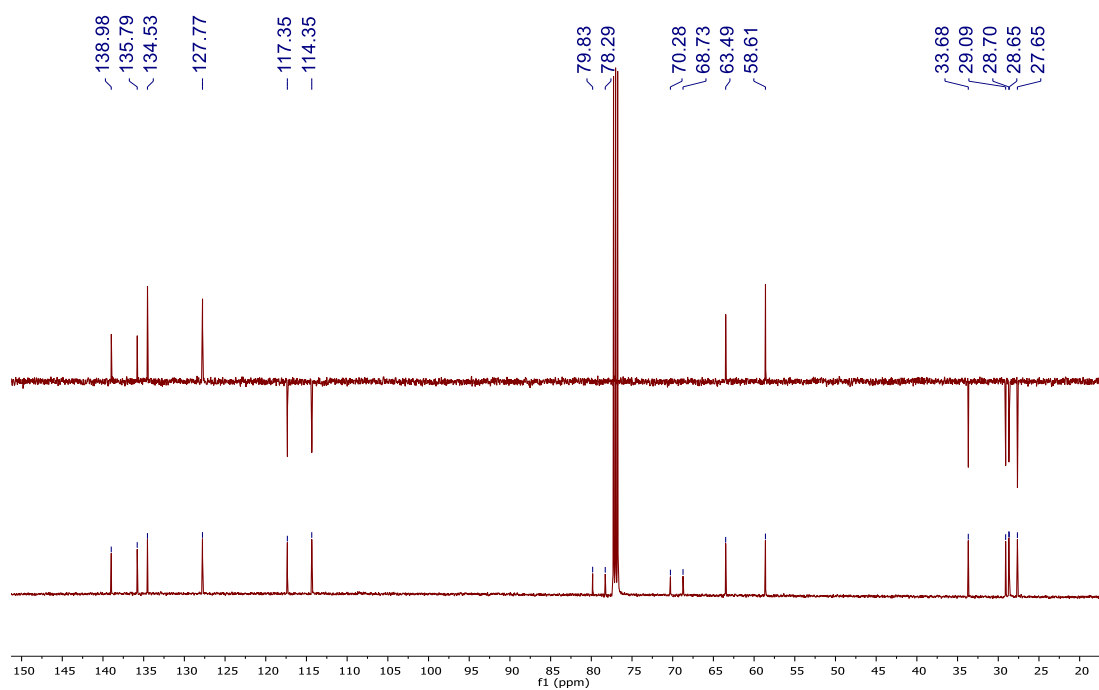

<sup>13</sup>C NMR and DEPT spectrum of **3'** in CDCl<sub>3</sub>.

**Figure S19.** <sup>1</sup>H NMR, <sup>13</sup>C NMR and DEPT spectrum of **3'** in CDCl<sub>3</sub>

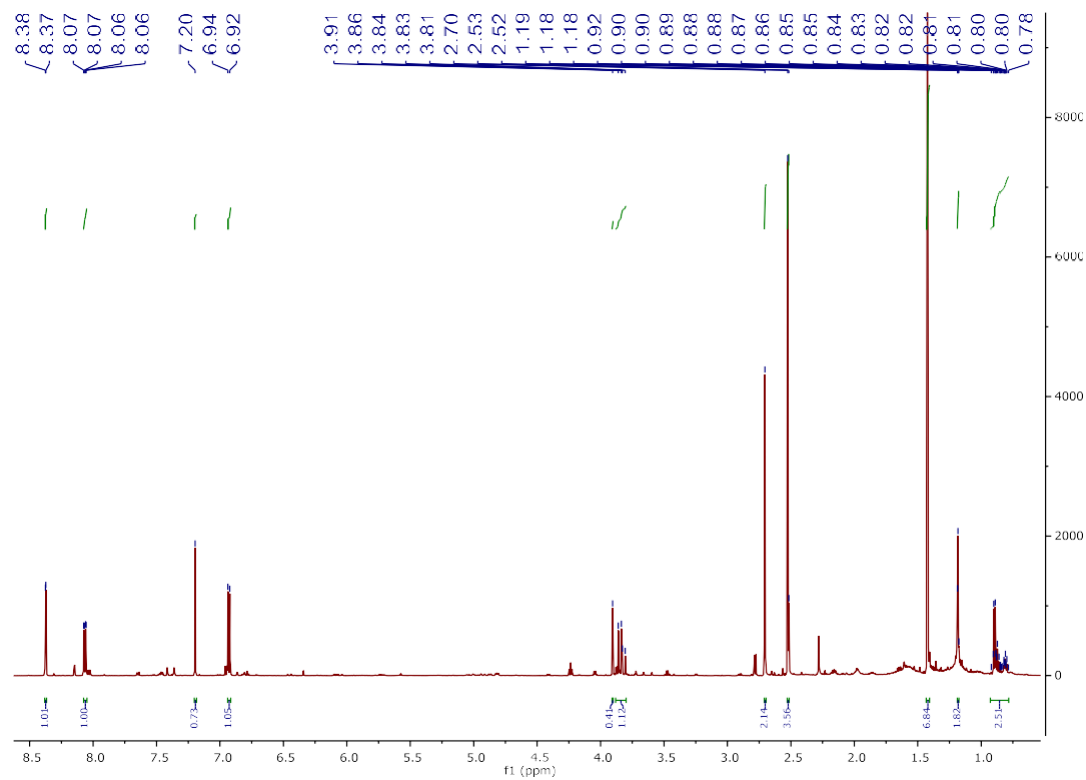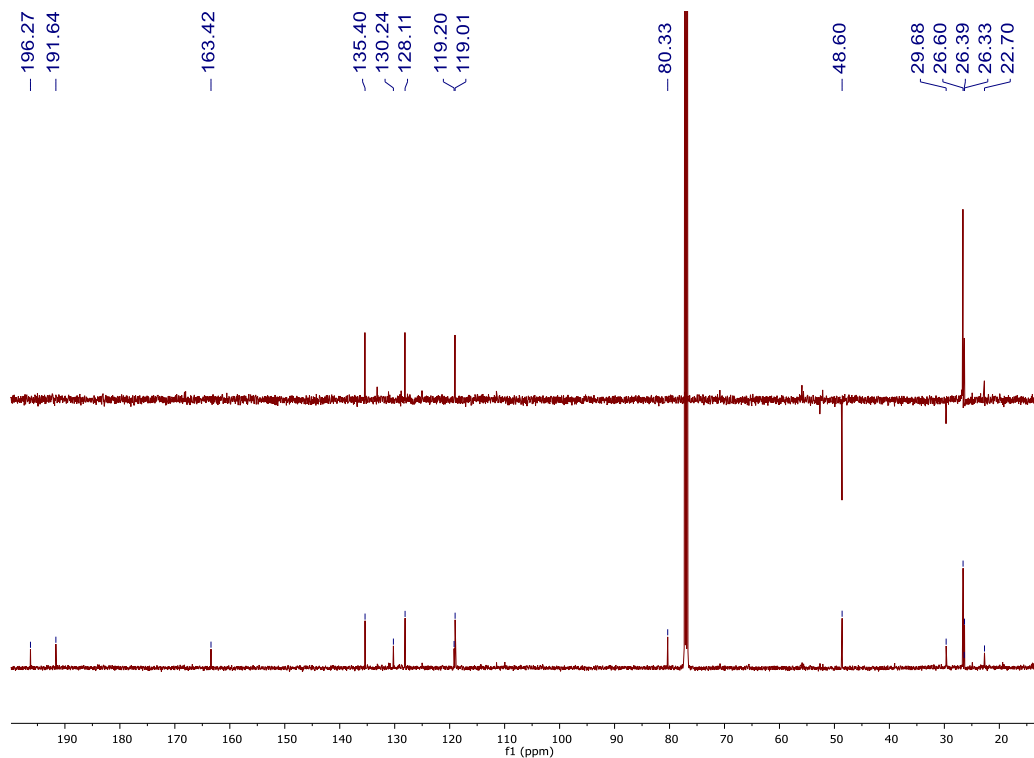

**Figure S20.** <sup>1</sup>H NMR, <sup>13</sup>C NMR, DEPT spectrum of **4'** in CDCl<sub>3</sub>



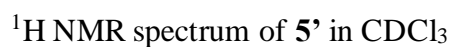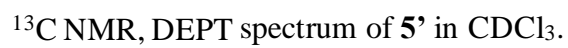

**Figure S21.**  $^1\text{H}$  NMR,  $^{13}\text{C}$  NMR, DEPT spectrum of **5'** in  $\text{CDCl}_3$ .

<sup>1</sup>H NMR spectrum of **6'** in CDCl<sub>3</sub>

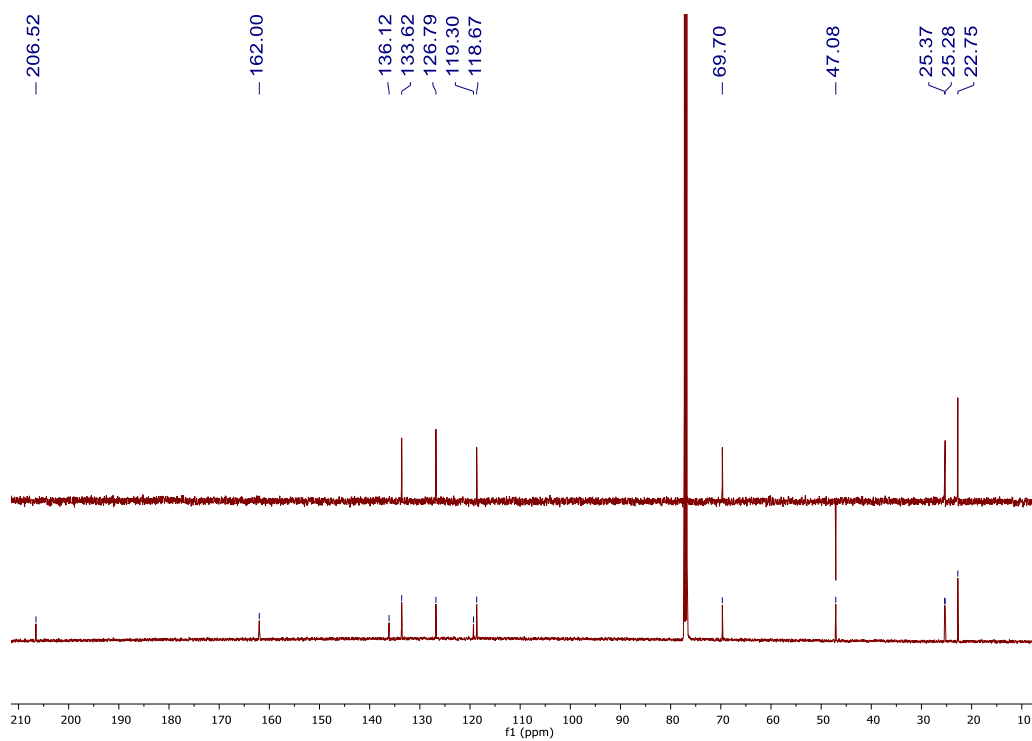

$^{13}\text{C}$  NMR, DEPT spectrum of **6'** in  $\text{CDCl}_3$

**Figure S22.**  $^1\text{H}$  NMR,  $^{13}\text{C}$  NMR, DEPT spectrum of **6'** in  $\text{CDCl}_3$ .

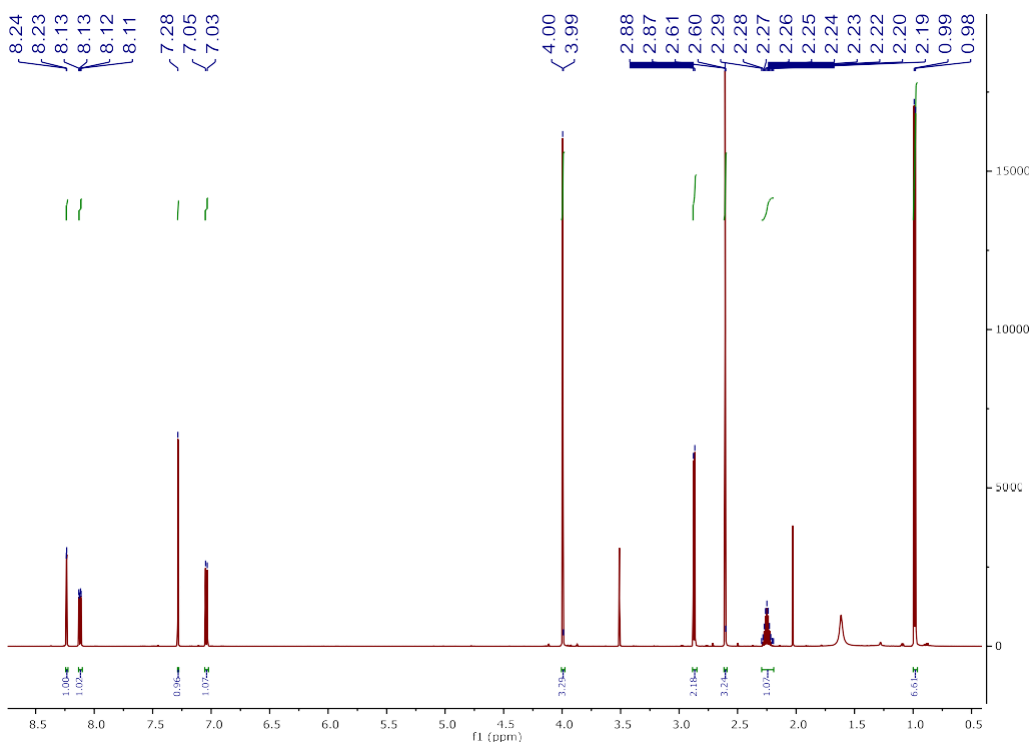

$^1\text{H}$  NMR spectrum of **7'** in  $\text{CDCl}_3$

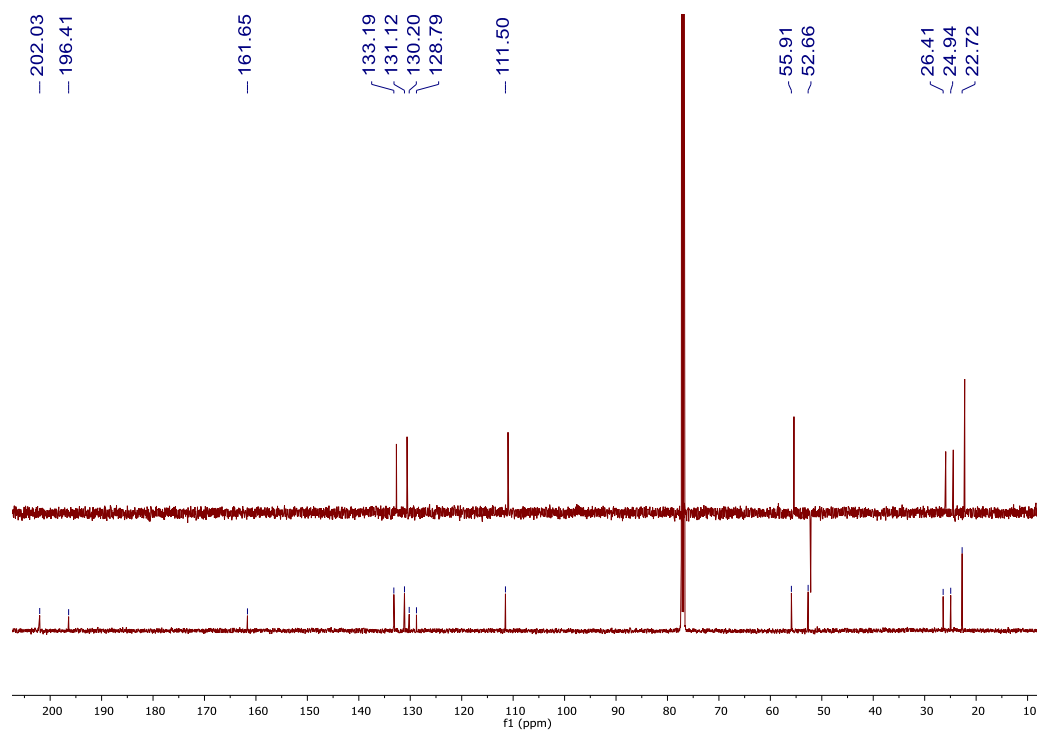

$^{13}\text{C}$  NMR, DEPT spectrum of **7'** in  $\text{CDCl}_3$

**Figure S23.**  $^1\text{H}$  NMR,  $^{13}\text{C}$  NMR, DEPT spectrum of **7'** in  $\text{CDCl}_3$

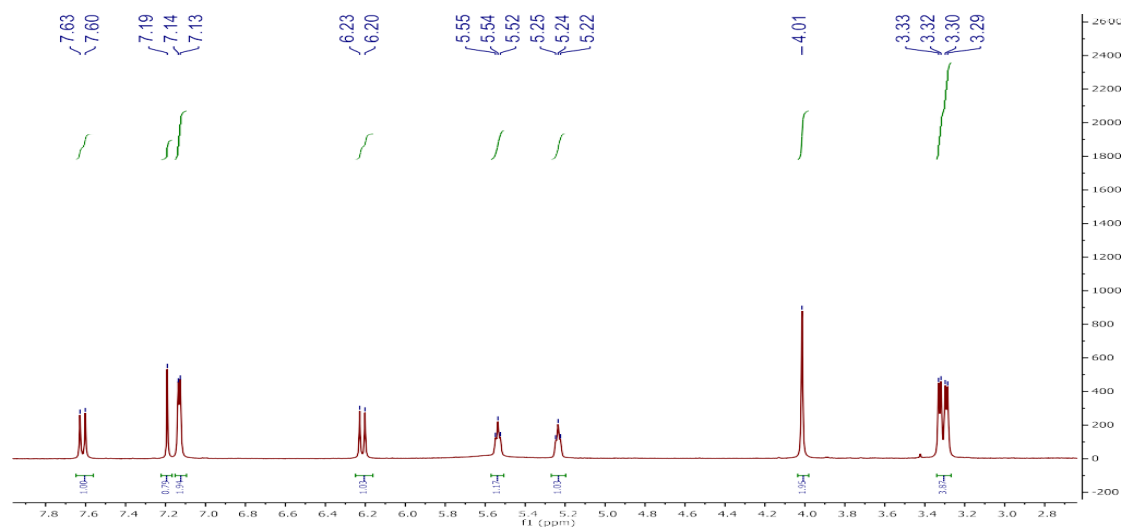

<sup>1</sup>H NMR spectrum of **8'** in CDCl<sub>3</sub>

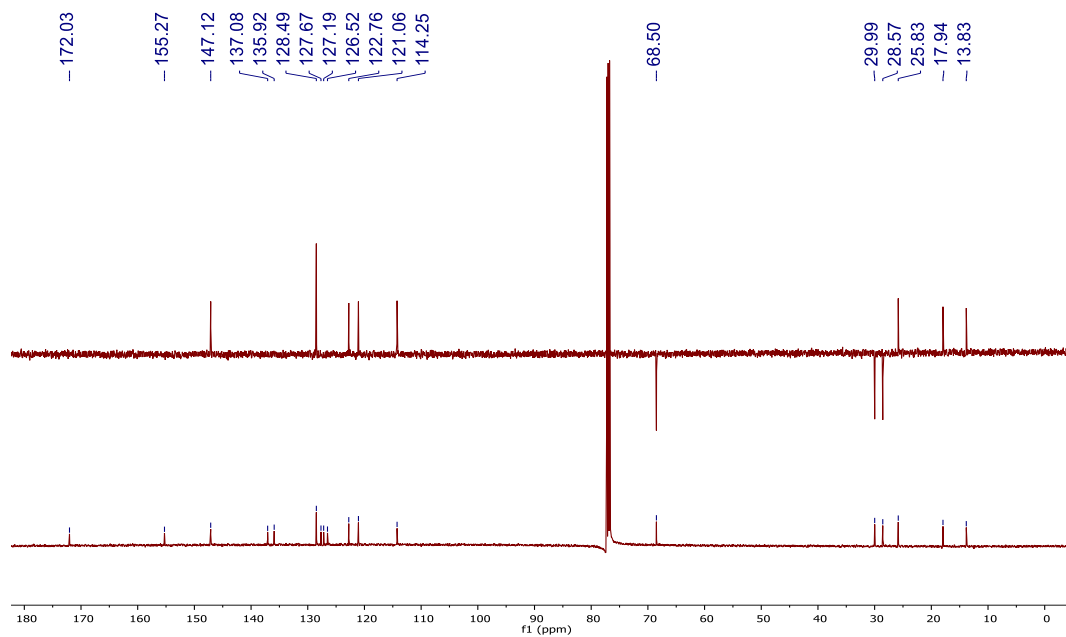

<sup>13</sup>C NMR, DEPT spectrum of **8'** in CDCl<sub>3</sub>

**Figure S24.** <sup>1</sup>H NMR, <sup>13</sup>C NMR, DEPT spectrum of **8'** in CDCl<sub>3</sub>

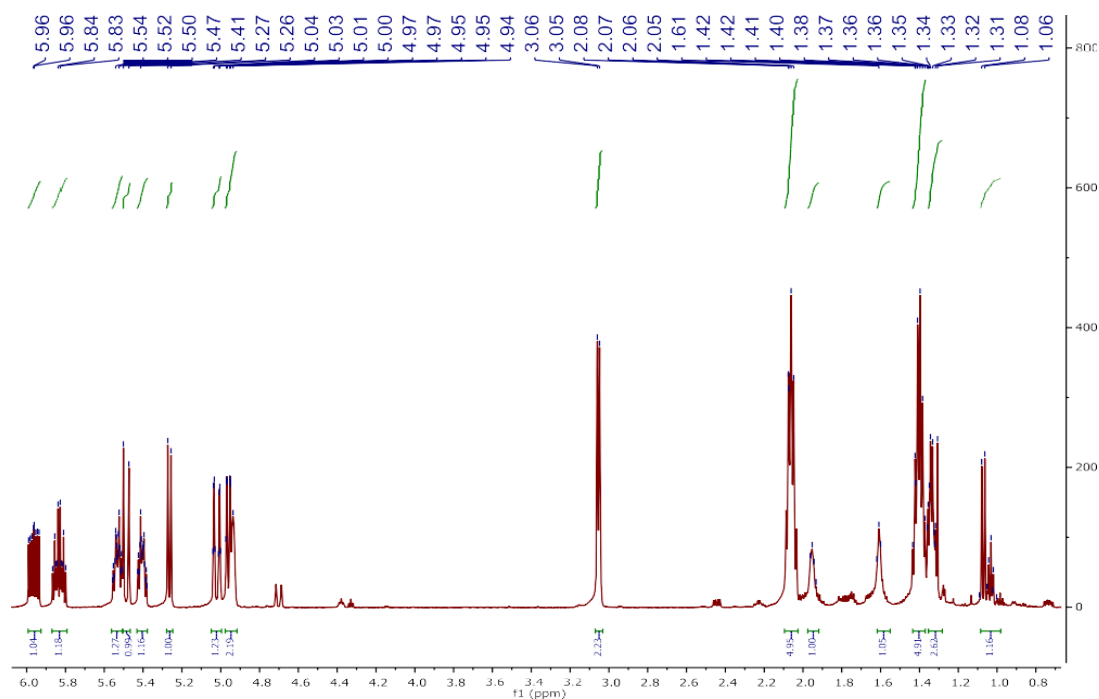

$^1\text{H}$  NMR spectrum of **9'** in  $\text{CDCl}_3$

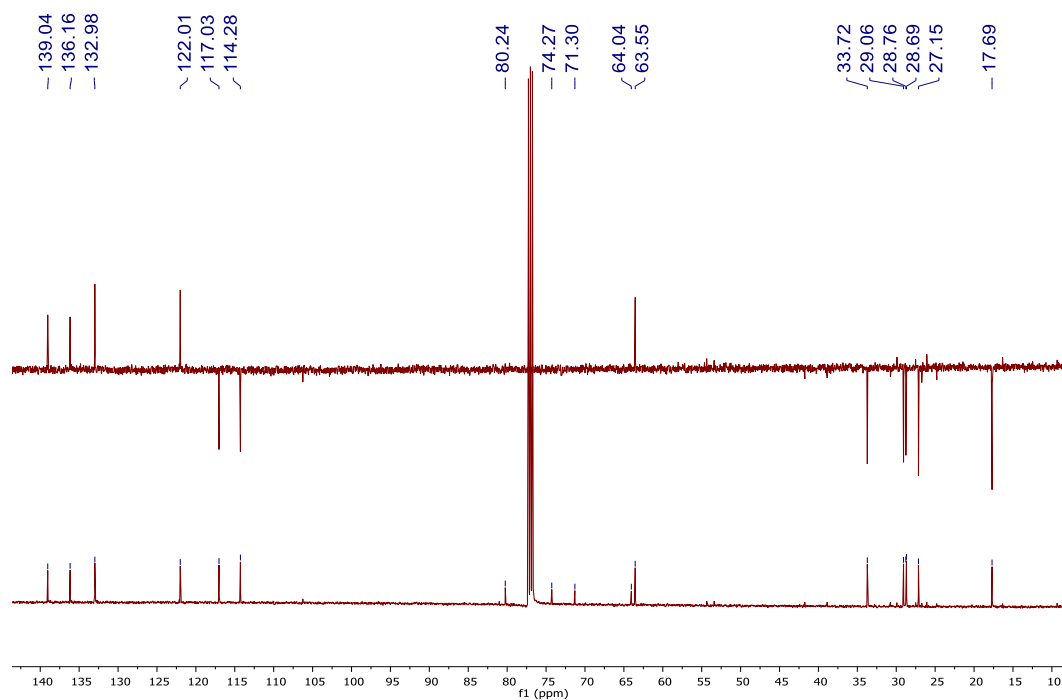

$^{13}\text{C}$  NMR, DEPT spectrum of **9'** in  $\text{CDCl}_3$

**Figure S25.**  $^1\text{H}$  NMR,  $^{13}\text{C}$  NMR, DEPT spectrum of **9'** in  $\text{CDCl}_3$

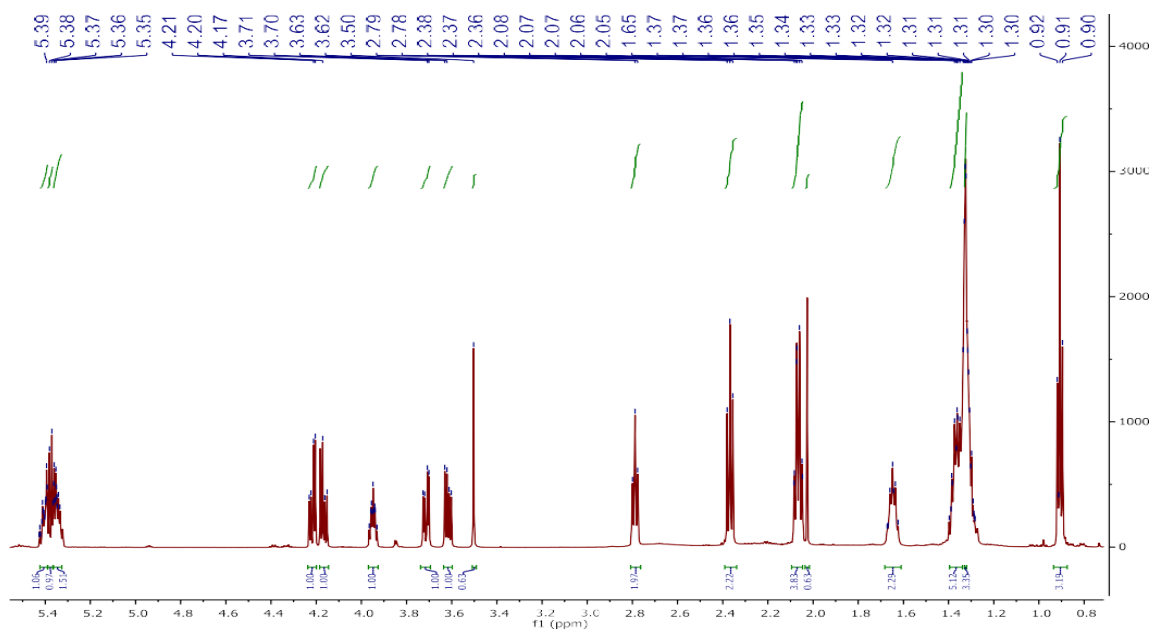

<sup>1</sup>H NMR spectrum of **10'** in CDCl<sub>3</sub>.

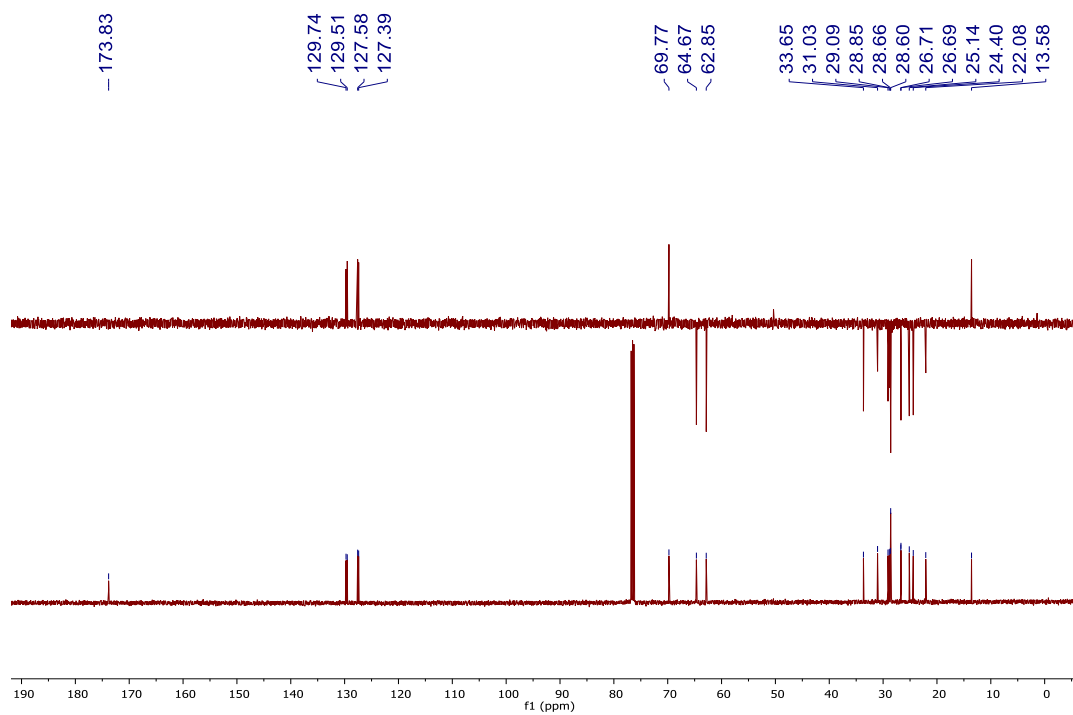

<sup>13</sup>C NMR, DEPT spectrum of **10'** in CDCl<sub>3</sub>.

**Figure S26.** <sup>1</sup>H NMR, <sup>13</sup>C NMR, DEPT spectrum of **10'** in CDCl<sub>3</sub>

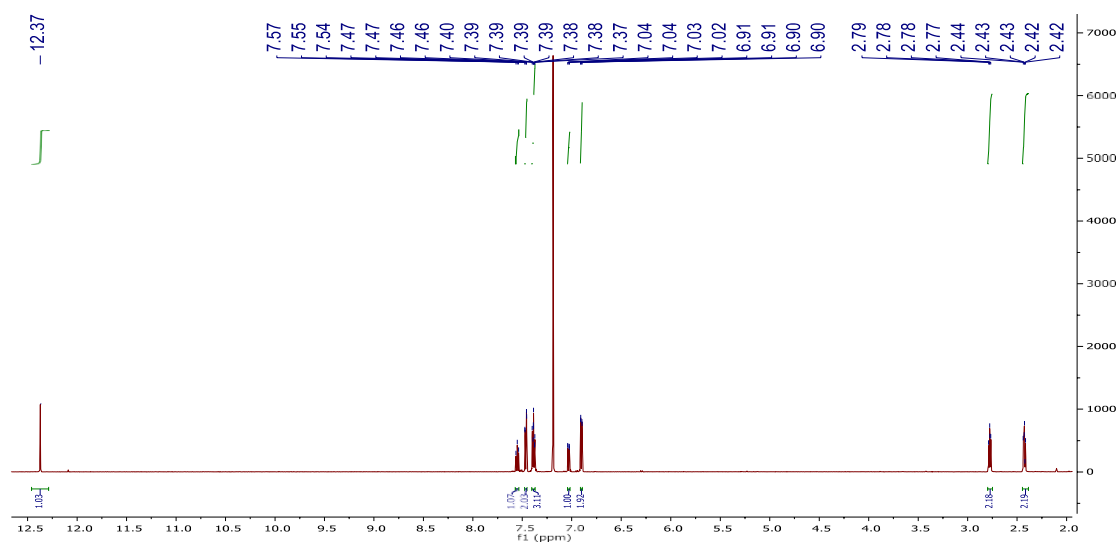

<sup>1</sup>H NMR spectrum of **11'** in CDCl<sub>3</sub>.

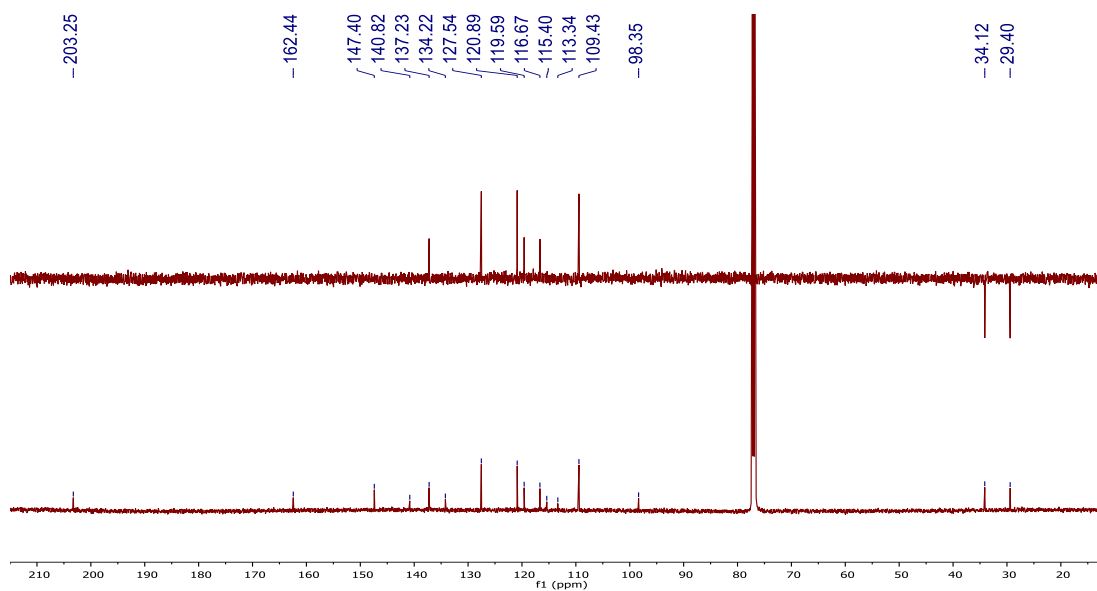

<sup>13</sup>C NMR, DEPT spectrum of **11'** in CDCl<sub>3</sub>.

**Figure S27.** <sup>1</sup>H NMR, <sup>13</sup>C NMR, DEPT spectrum of **11'** in CDCl<sub>3</sub>.

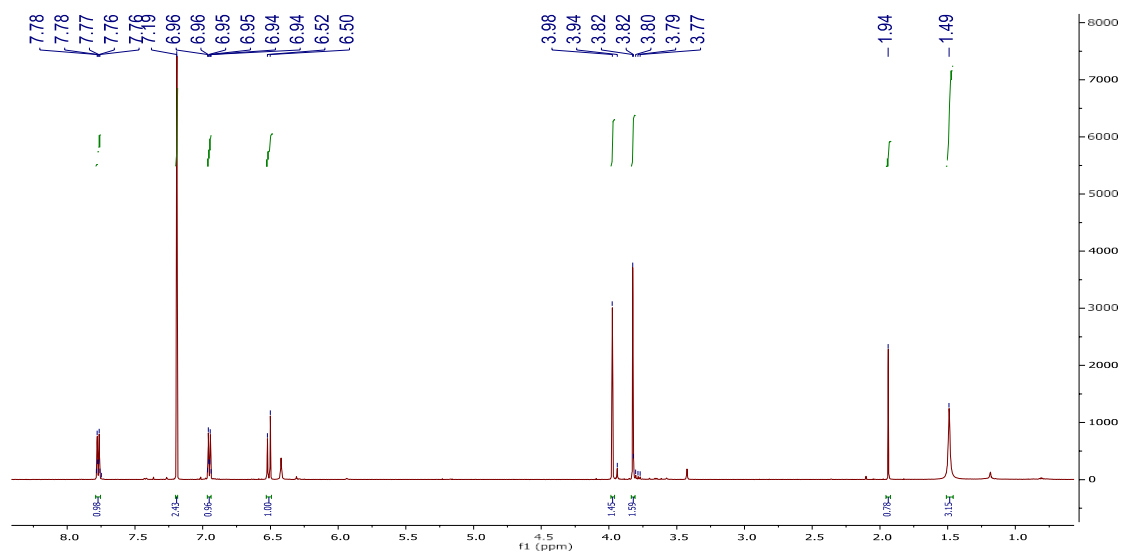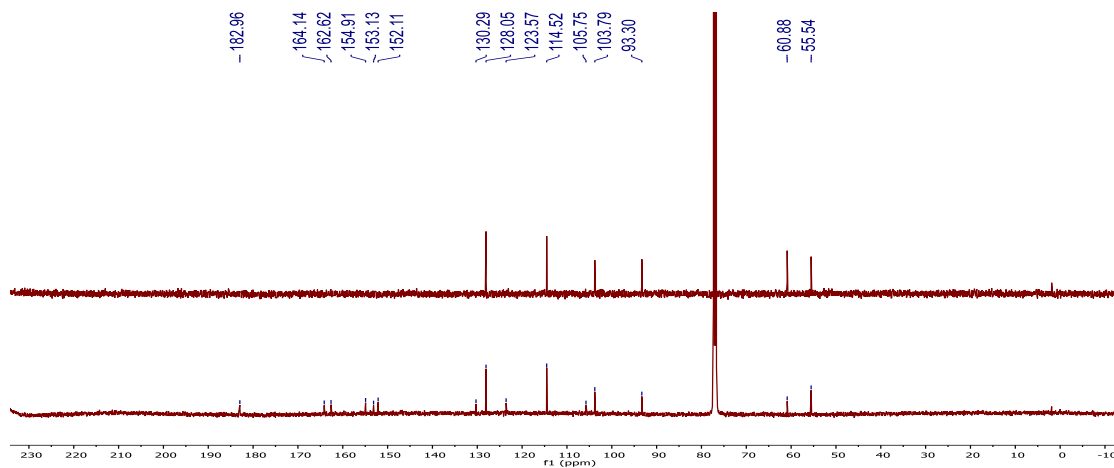

**Figure S28.**  $^1\text{H}$  NMR,  $^{13}\text{C}$  NMR, DEPT spectrum of **12'** in  $\text{CDCl}_3$ .



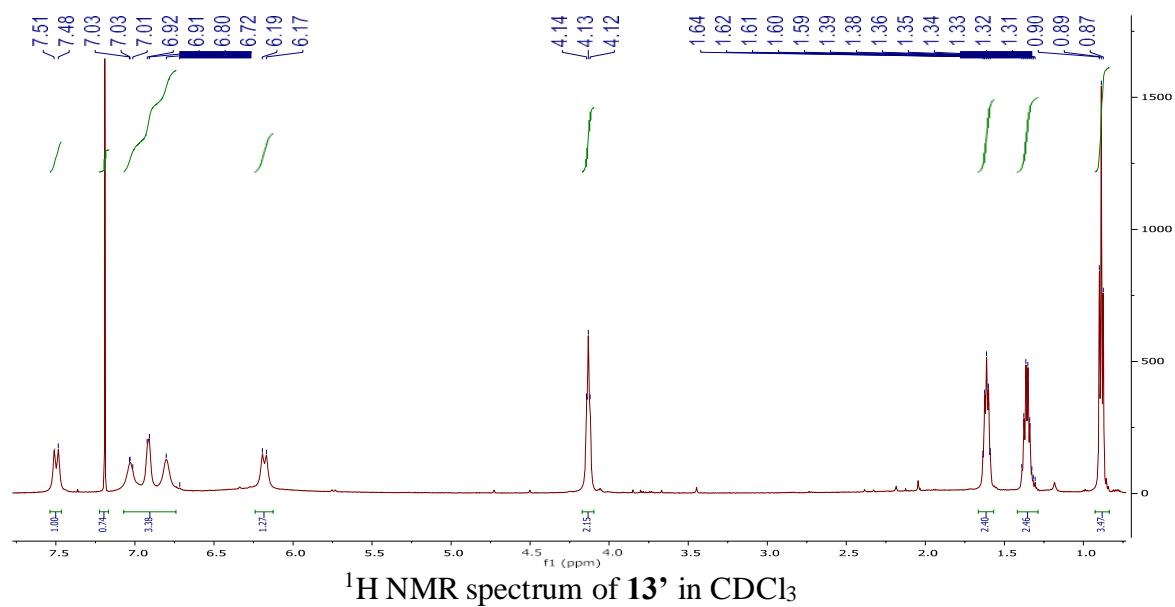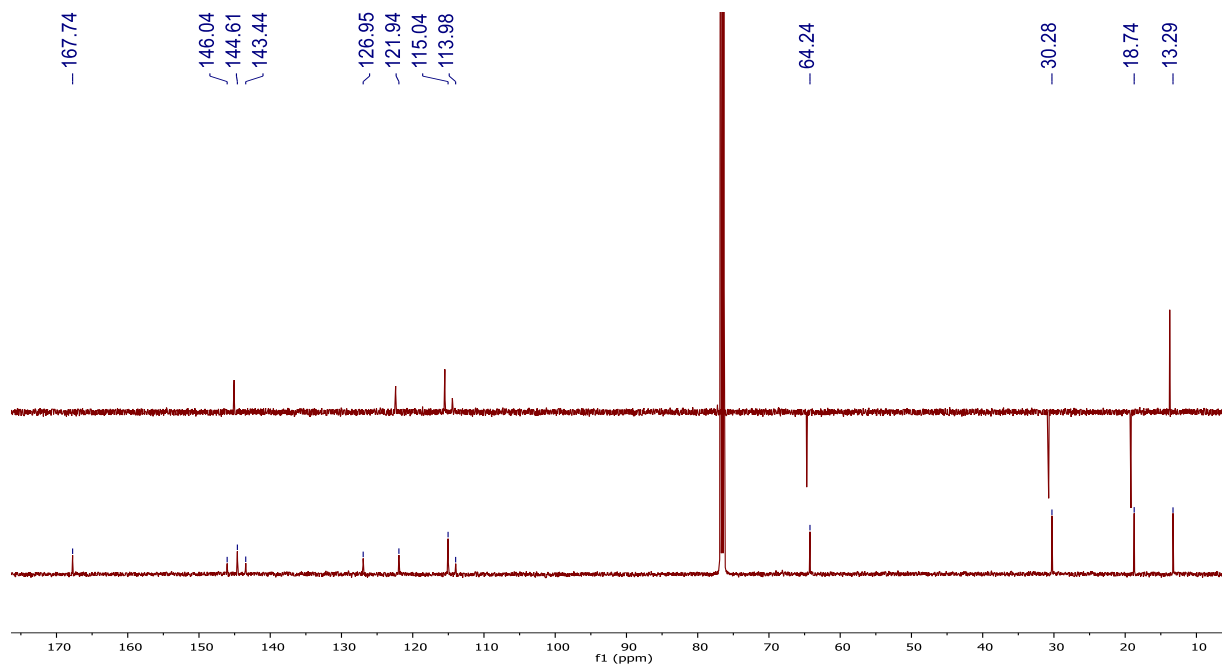

$^{13}\text{C}$  NMR, DEPT spectrum of **13'** in  $\text{CDCl}_3$   
**Figure S29.**  $^1\text{H}$  NMR,  $^{13}\text{C}$  NMR, DEPT spectrum of **13'** in  $\text{CDCl}_3$

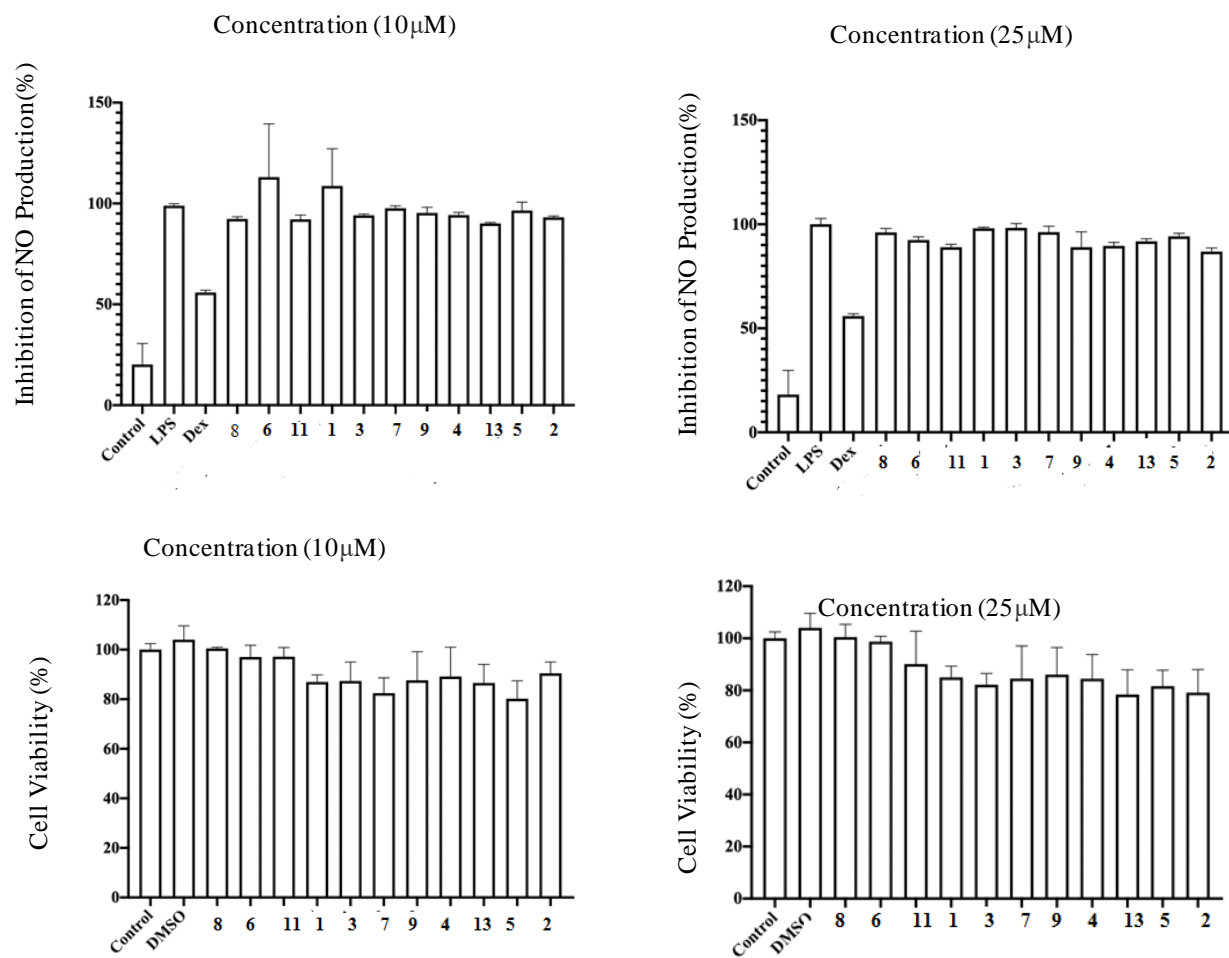

**Figure S30.** Inhibitory Effects of *A.nitrosa* compounds on LPS-Enhanced Inflammatory Mediators

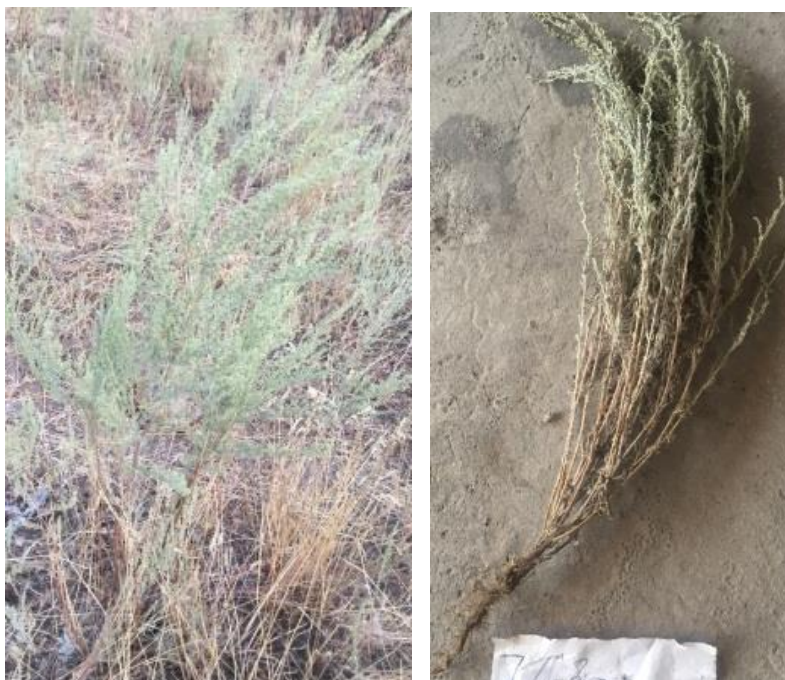

**Figure S31.** Pictures of the whole plant of *Artemisia nitrosa*.

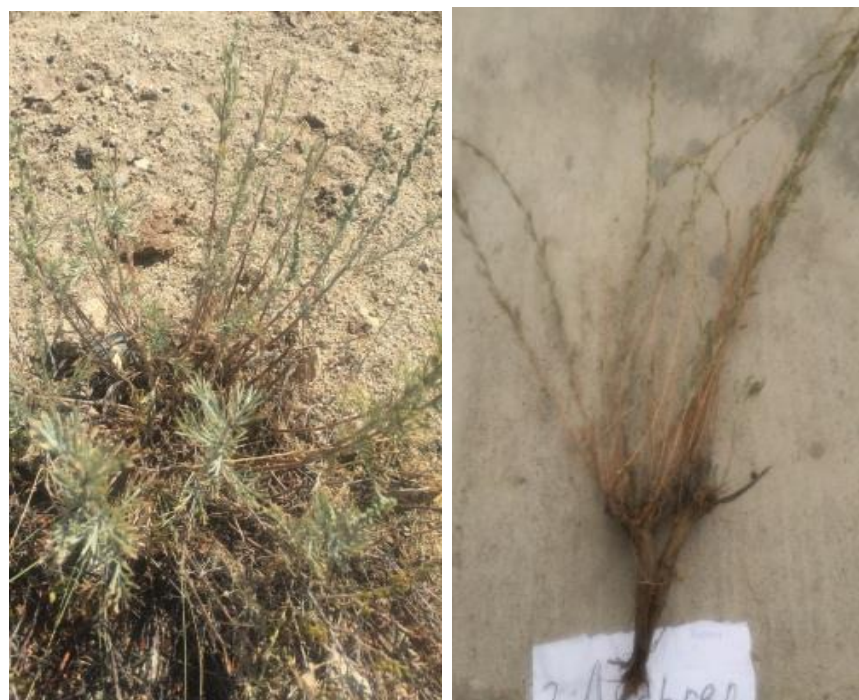

**Figure S32.** Pictures of the whole plant of *Artemisia marschelliana*.
